# Supplementary material for: Identification and differential analysis of noncoding RNAs in response to drought in Phyllostachys aureosulcata f. spectabilis
Source: Front Plant Sci. 2022 Nov 10;13:1040470. doi: 10.3389/fpls.2022.1040470 (PMC9686404; doi:10.3389/fpls.2022.1040470)
Supplement: Supplementary file 5 [file Table_4.xlsx]

## Sheet: All_vs_DEG.KEGG
Supplementary Table 4: KEGG enrichment of RNAs host gene
circRNA host gene
KEGG Pathway	ko ID	DEgene	gene	Degene (all)	gene (all)	Gene ID	KOs
Galactose metabolism	ko00052	1	158	24	12921	PH02Gene41019	K00844
Carbon metabolism	ko01200	2	798	24	12921	PH02Gene41019;Phyllostachys_edulis_newGene_357080	K00844+K00036
Protein processing in endoplasmic reticulum	ko04141	2	564	24	12921	PH02Gene37282;PH02Gene43585	K09487+K09561
mRNA surveillance pathway	ko03015	2	351	24	12921	PH02Gene14906;PH02Gene21609	K14401+K14327
Spliceosome	ko03040	1	520	24	12921	PH02Gene12772	K12815
Fatty acid biosynthesis	ko00061	3	121	24	12921	PH02Gene12941;PH02Gene14518;PH02Gene44890	K00645+K01897+K01897
RNA transport	ko03013	3	487	24	12921	PH02Gene11038;PH02Gene21609;PH02Gene23359	K05749+K14327+K14314
Peroxisome	ko04146	3	233	24	12921	PH02Gene14518;PH02Gene44890;PH02Gene45872	K01897+K01897+K13342
RNA degradation	ko03018	2	297	24	12921	PH02Gene02932;PH02Gene35416	K12604+K12605
Starch and sucrose metabolism	ko00500	1	427	24	12921	PH02Gene41019	K00844
Glycosaminoglycan degradation	ko00531	1	41	24	12921	PH02Gene41297	K01205
Pentose phosphate pathway	ko00030	1	165	24	12921	Phyllostachys_edulis_newGene_357080	K00036
SNARE interactions in vesicular transport	ko04130	1	87	24	12921	PH02Gene28790	K08495
Fatty acid metabolism	ko01212	3	198	24	12921	PH02Gene12941;PH02Gene14518;PH02Gene44890	K00645+K01897+K01897
Ubiquitin mediated proteolysis	ko04120	1	331	24	12921	PH02Gene43585	K09561
Phosphatidylinositol signaling system	ko04070	1	167	24	12921	PH02Gene18238	K00889
Lysine degradation	ko00310	1	113	24	12921	PH02Gene29988	K11426
Proteasome	ko03050	1	226	24	12921	PH02Gene50343	K02729
Purine metabolism	ko00230	1	305	24	12921	PH02Gene29197	K01490
Fructose and mannose metabolism	ko00051	1	191	24	12921	PH02Gene41019	K00844
Glutathione metabolism	ko00480	1	283	24	12921	Phyllostachys_edulis_newGene_357080	K00036
Amino sugar and nucleotide sugar metabolism	ko00520	1	395	24	12921	PH02Gene41019	K00844
Fatty acid degradation	ko00071	2	137	24	12921	PH02Gene14518;PH02Gene44890	K01897+K01897
Non-homologous end-joining	ko03450	1	30	24	12921	PH02Gene10163	K10777
Glycolysis / Gluconeogenesis	ko00010	1	448	24	12921	PH02Gene41019	K00844
Inositol phosphate metabolism	ko00562	1	184	24	12921	PH02Gene18238	K00889
Plant-pathogen interaction	ko04626	3	566	24	12921	PH02Gene31251;PH02Gene31681;PH02Gene37282	K13412+K05391+K09487
Endocytosis	ko04144	1	441	24	12921	PH02Gene18238	K00889
lncRNA host gene
KEGG Pathway	ko ID	DEgene	gene	Degene (all)	gene (all)	Gene ID	KOs
Glycolysis / Gluconeogenesis	ko00010	221	448	6478	12921	PH02Gene00228;PH02Gene01092;PH02Gene01289;PH02Gene01726;PH02Gene02028;PH02Gene02209;PH02Gene02613;PH02Gene03047;PH02Gene03176;PH02Gene03238;PH02Gene03563;PH02Gene03713;PH02Gene03718;PH02Gene03719;PH02Gene04463;PH02Gene04871;PH02Gene04989;PH02Gene05313;PH02Gene05321;PH02Gene05455;PH02Gene05691;PH02Gene05693;PH02Gene05879;PH02Gene05896;PH02Gene06094;PH02Gene06290;PH02Gene07328;PH02Gene07584;PH02Gen…	K01689+K00895+K01810+K00627+K00128+K01785+K00134+K14085+K00161+K00134+K00873+K15633+K15633+K15633+K15633+K00895+K01803+K00128+K00134+K00121+K00016+K00627+K00121+K00134+K03103+K00844+K00895+K00162+K01689+K01913+K01803+K00850+K00128+K00134+K00850+K01785+K00162+K00895+K00627+K00161+K00873+K01835+K01785+K01785+K01803+K00134+K00134+K00002+K00627+K00873+K01623+K00134+K15633+K00627+K01810+K00134+K01792+…
Histidine metabolism	ko00340	34	51	6478	12921	PH02Gene02028;PH02Gene03047;PH02Gene05313;PH02Gene08122;PH02Gene08494;PH02Gene15222;PH02Gene16011;PH02Gene16239;PH02Gene16240;PH02Gene16709;PH02Gene16770;PH02Gene22865;PH02Gene22988;PH02Gene24183;PH02Gene29324;PH02Gene29326;PH02Gene29790;PH02Gene30348;PH02Gene30680;PH02Gene32530;PH02Gene36949;PH02Gene36950;PH02Gene44205;PH02Gene46515;PH02Gene48243;PH02Gene49140;Phyllostachys_edulis_newGene_142596…	K00128+K14085+K00128+K00128+K19787+K00013+K11755+K00128+K00128+K01814+K00817+K18649+K14085+K14085+K00128+K00128+K00128+K14085+K01590+K00128+K01590+K01590+K01590+K01590+K00128+K01590+K01590+K00128+K14085+K00128+K00817+K00128+K14085+K01693
Phosphonate and phosphinate metabolism	ko00440	11	17	6478	12921	PH02Gene02621;PH02Gene03435;PH02Gene05631;PH02Gene16625;PH02Gene17545;PH02Gene21898;PH02Gene22106;PH02Gene29426;PH02Gene33919;PH02Gene49048;Phyllostachys_edulis_newGene_91541	K00993+K00967+K00993+K00967+K00967+K00967+K00967+K00968+K00968+K00967+K00993
Ribosome biogenesis in eukaryotes	ko03008	149	281	6478	12921	PH02Gene00016;PH02Gene00468;PH02Gene00733;PH02Gene02033;PH02Gene02285;PH02Gene02571;PH02Gene02878;PH02Gene04542;PH02Gene04999;PH02Gene05009;PH02Gene05662;PH02Gene05713;PH02Gene07576;PH02Gene07912;PH02Gene08131;PH02Gene08132;PH02Gene09588;PH02Gene09594;PH02Gene10141;PH02Gene10427;PH02Gene10428;PH02Gene10429;PH02Gene10430;PH02Gene10548;PH02Gene10790;PH02Gene11000;PH02Gene11884;PH02Gene12156;PH02Gen…	K14546+K14570+K14290+K14290+K14555+K06943+K03115+K14549+K11128+K12845+K11883+K14565+K14539+K07179+K14545+K11129+K06943+K11131+K14290+K14537+K14564+K14564+K14564+K07562+K14564+K14556+K03097+K03537+K14569+K14548+K03115+K13288+K14564+K14564+K14537+K14554+K14554+K07936+K14546+K12619+K03537+K14573+K14545+K14539+K14571+K14566+K14565+K14555+K14539+K14569+K11129+K14521+K14561+K14521+K11130+K14548+K14550+…
Inositol phosphate metabolism	ko00562	101	184	6478	12921	PH02Gene00042;PH02Gene00067;PH02Gene00417;PH02Gene03460;PH02Gene04989;PH02Gene05437;PH02Gene05492;PH02Gene05601;PH02Gene06094;PH02Gene06829;PH02Gene07927;PH02Gene08900;PH02Gene09581;PH02Gene09851;PH02Gene09920;PH02Gene10386;PH02Gene11809;PH02Gene13802;PH02Gene13904;PH02Gene14589;PH02Gene15040;PH02Gene15234;PH02Gene15254;PH02Gene16552;PH02Gene17455;PH02Gene17636;PH02Gene18238;PH02Gene18865;PH02Gen…	K00913+K21797+K10572+K00889+K01803+K01858+K22913+K00999+K03103+K00915+K01803+K10047+K00913+K00889+K00888+K01803+K01114+K00921+K00888+K00999+K00921+K00921+K01858+K01114+K00913+K00915+K00889+K00913+K00915+K01114+K18649+K01803+K05857+K21797+K00921+K00913+K22913+K00913+K00921+K01114+K10047+K00914+K01803+K01803+K00889+K22913+K15422+K00921+K01114+K01114+K00921+K00913+K00469+K19801+K05857+K01858+K00921+…
Propanoate metabolism	ko00640	45	99	6478	12921	PH02Gene02951;PH02Gene05691;PH02Gene07774;PH02Gene18739;PH02Gene19660;PH02Gene20071;PH02Gene20843;PH02Gene24580;PH02Gene25015;PH02Gene25316;PH02Gene27148;PH02Gene27283;PH02Gene28281;PH02Gene28803;PH02Gene29224;PH02Gene29255;PH02Gene29517;PH02Gene30400;PH02Gene31039;PH02Gene31806;PH02Gene31873;PH02Gene38720;PH02Gene41582;PH02Gene42544;PH02Gene44455;PH02Gene44507;PH02Gene45210;PH02Gene46642;PH02Gen…	K05605+K00016+K01692+K00626+K00626+K00016+K00232+K00232+K01900+K00382+K23146+K00232+K00232+K01900+K11262+K00382+K00382+K00166+K00382+K00016+K00382+K11262+K01895+K00016+K00016+K00016+K05605+K00232+K00016+K00232+K00626+K00167+K00167+K05605+K01900+K01900+K00232+K00382+K00382+K00232+K01895+K01578+K00232+K23146+K05605
alpha-Linolenic acid metabolism	ko00592	58	126	6478	12921	PH02Gene05899;PH02Gene08785;PH02Gene10309;PH02Gene11239;PH02Gene13921;PH02Gene14304;PH02Gene14818;PH02Gene14820;PH02Gene15305;PH02Gene15509;PH02Gene18274;PH02Gene19022;PH02Gene19170;PH02Gene20843;PH02Gene21016;PH02Gene22015;PH02Gene23970;PH02Gene24580;PH02Gene25304;PH02Gene25746;PH02Gene27283;PH02Gene28163;PH02Gene28164;PH02Gene28281;PH02Gene29111;PH02Gene31405;PH02Gene31441;PH02Gene33378;PH02Gen…	K07513+K01723+K00454+K10527+K01047+K10528+K05894+K05894+K05894+K10528+K07513+K05894+K01723+K00232+K01723+K22389+K05894+K00232+K10527+K05894+K00232+K05894+K05894+K00232+K10527+K05894+K14674+K18857+K18857+K10527+K05894+K05894+K05894+K05894+K18857+K10527+K05894+K07513+K16818+K00224+K00232+K00454+K00232+K10527+K05894+K10527+K00232+K10527+K00224+K00224+K00224+K10527+K22389+K10527+K10527+K00232+K00232+…
Glycine, serine and threonine metabolism	ko00260	95	196	6478	12921	PH02Gene00585;PH02Gene03047;PH02Gene03291;PH02Gene03713;PH02Gene03718;PH02Gene03719;PH02Gene03981;PH02Gene04032;PH02Gene04463;PH02Gene05400;PH02Gene05511;PH02Gene05779;PH02Gene06738;PH02Gene06739;PH02Gene07644;PH02Gene09705;PH02Gene09721;PH02Gene09787;PH02Gene11084;PH02Gene11705;PH02Gene11851;PH02Gene11852;PH02Gene12071;PH02Gene12312;PH02Gene12391;PH02Gene13384;PH02Gene15793;PH02Gene16481;PH02Gen…	K00108+K14085+K00276+K15633+K15633+K15633+K00130+K00276+K15633+K00499+K00827+K00600+K01695+K01695+K00600+K15919+K00499+K00133+K01079+K14272+K01695+K01695+K00928+K00600+K15633+K00605+K00133+K14272+K00058+K00499+K00133+K00605+K12524+K14085+K00827+K00600+K14085+K00130+K00382+K00276+K00827+K12235+K00600+K00831+K00605+K00382+K00382+K00130+K00600+K14085+K00281+K00600+K00382+K00058+K00382+K01834+K12524+…
Amino sugar and nucleotide sugar metabolism	ko00520	213	395	6478	12921	PH02Gene00158;PH02Gene00159;PH02Gene00211;PH02Gene00421;PH02Gene01289;PH02Gene01527;PH02Gene02161;PH02Gene02681;PH02Gene02780;PH02Gene02792;PH02Gene03004;PH02Gene03197;PH02Gene03511;PH02Gene04344;PH02Gene05185;PH02Gene05186;PH02Gene05187;PH02Gene05189;PH02Gene05339;PH02Gene05557;PH02Gene05641;PH02Gene06290;PH02Gene06750;PH02Gene06889;PH02Gene07114;PH02Gene07363;PH02Gene07567;PH02Gene07621;PH02Gen…	K12450+K08678+K00966+K13379+K01810+K00326+K01183+K08679+K12447+K12446+K20547+K01183+K00966+K20547+K01183+K01183+K01183+K01183+K01711+K13648+K00963+K00844+K01183+K12449+K08679+K00770+K13648+K13648+K13648+K01183+K01183+K00965+K00975+K00012+K13379+K01835+K13648+K00847+K00012+K00770+K08679+K00975+K15920+K01183+K01183+K01183+K01711+K01183+K01809+K05305+K00975+K01810+K13648+K08679+K01183+K08678+K00844+…
Thiamine metabolism	ko00730	36	68	6478	12921	PH02Gene00355;PH02Gene07407;PH02Gene07796;PH02Gene12161;PH02Gene12313;PH02Gene15696;PH02Gene16139;PH02Gene18228;PH02Gene20524;PH02Gene20525;PH02Gene22727;PH02Gene24622;PH02Gene26517;PH02Gene28181;PH02Gene29284;PH02Gene30024;PH02Gene30785;PH02Gene32770;PH02Gene35505;PH02Gene38636;PH02Gene42013;PH02Gene43032;PH02Gene43140;PH02Gene43149;PH02Gene43683;PH02Gene43927;PH02Gene45630;PH02Gene46257;PH02Gen…	K00939+K00939+K20896+K01662+K00939+K03147+K00939+K01662+K00939+K00939+K01662+K00939+K01662+K01662+K01662+K00939+K04487+K01662+K06949+K00939+K22911+K06949+K22911+K22911+K01662+K03146+K22911+K00939+K01662+K00939+K22911+K00939+K00939+K14153+K00939+K03147
Glycosylphosphatidylinositol (GPI)-anchor biosynthesis	ko00563	30	59	6478	12921	PH02Gene01159;PH02Gene05672;PH02Gene06115;PH02Gene09438;PH02Gene11102;PH02Gene25989;PH02Gene34106;PH02Gene37184;PH02Gene37383;PH02Gene38011;PH02Gene39383;PH02Gene41320;PH02Gene41771;PH02Gene43287;PH02Gene45957;PH02Gene50019;Phyllostachys_edulis_newGene_101253;Phyllostachys_edulis_newGene_167719;Phyllostachys_edulis_newGene_167720;Phyllostachys_edulis_newGene_219104;Phyllostachys_edulis_newGene_25…	K07541+K05286+K05290+K05291+K07542+K05285+K05290+K05294+K05284+K05292+K03858+K03860+K05290+K05285+K07542+K05283+K05292+K05294+K05294+K05284+K05294+K05294+K05284+K05294+K03860+K05284+K05283+K05283+K05291+K05290
2-Oxocarboxylic acid metabolism	ko01210	87	192	6478	12921	PH02Gene01974;PH02Gene03278;PH02Gene03820;PH02Gene05523;PH02Gene05837;PH02Gene06250;PH02Gene08798;PH02Gene09787;PH02Gene10606;PH02Gene11705;PH02Gene12071;PH02Gene12143;PH02Gene13039;PH02Gene13301;PH02Gene13344;PH02Gene14524;PH02Gene15793;PH02Gene16481;PH02Gene16577;PH02Gene17336;PH02Gene17477;PH02Gene18745;PH02Gene18885;PH02Gene23652;PH02Gene23732;PH02Gene24223;PH02Gene24270;PH02Gene24815;PH02Gen…	K00930+K00030+K01438+K00053+K01681+K00053+K00052+K00133+K00814+K14272+K00928+K12153+K14682+K14682+K00053+K00031+K00133+K14272+K12153+K00031+K12153+K01681+K00133+K00052+K01653+K01438+K00930+K12153+K00826+K01652+K01653+K01681+K00053+K00053+K01687+K01653+K01653+K01703+K14455+K14272+K00053+K00030+K01681+K01653+K00030+K00814+K01652+K00031+K00053+K00052+K01704+K00620+K01687+K00053+K00930+K14455+K01438+…
Protein processing in endoplasmic reticulum	ko04141	281	564	6478	12921	PH02Gene00162;PH02Gene00168;PH02Gene00193;PH02Gene00227;PH02Gene00289;PH02Gene00595;PH02Gene00748;PH02Gene00831;PH02Gene01498;PH02Gene02139;PH02Gene02847;PH02Gene03060;PH02Gene03088;PH02Gene03151;PH02Gene03205;PH02Gene03206;PH02Gene03485;PH02Gene03486;PH02Gene03498;PH02Gene03529;PH02Gene03597;PH02Gene03640;PH02Gene03701;PH02Gene04132;PH02Gene04134;PH02Gene04458;PH02Gene04799;PH02Gene04981;PH02Gen…	K03283+K03283+K09562+K13993+K09490+K14016+K10666+K04523+K10084+K13993+K09490+K08288+K03283+K10575+K16196+K16196+K13993+K13993+K13993+K09562+K13525+K10666+K06689+K13993+K13993+K10956+K14016+K03283+K09503+K13993+K10839+K03094+K06689+K07342+K01228+K09487+K08057+K12668+K09562+K03283+K13993+K13993+K09503+K08288+K01228+K04079+K09561+K06689+K11863+K07151+K13525+K12667+K07953+K09490+K09490+K01230+K13993+…
Terpenoid backbone biosynthesis	ko00900	103	178	6478	12921	PH02Gene00438;PH02Gene00923;PH02Gene01595;PH02Gene01632;PH02Gene01721;PH02Gene02240;PH02Gene03038;PH02Gene03198;PH02Gene04524;PH02Gene04633;PH02Gene04925;PH02Gene06218;PH02Gene06534;PH02Gene06879;PH02Gene07047;PH02Gene07905;PH02Gene08799;PH02Gene09998;PH02Gene10181;PH02Gene12161;PH02Gene12246;PH02Gene12621;PH02Gene12707;PH02Gene13343;PH02Gene14026;PH02Gene14426;PH02Gene16759;PH02Gene17091;PH02Gen…	K00787+K01641+K11778+K01597+K00787+K00587+K01597+K05906+K00787+K00021+K15892+K03527+K00787+K01597+K00021+K00991+K13789+K00787+K00587+K01662+K05955+K00021+K11778+K11778+K03526+K13789+K03526+K01641+K11778+K01641+K01662+K00626+K00626+K01597+K00938+K01641+K15889+K01662+K05356+K01662+K00787+K03526+K01662+K01662+K11778+K01662+K05356+K15793+K00021+K15889+K01641+K05955+K12742+K12742+K11778+K00787+K08658+…
Brassinosteroid biosynthesis	ko00905	22	31	6478	12921	PH02Gene01224;PH02Gene01228;PH02Gene03042;PH02Gene03043;PH02Gene04007;PH02Gene09813;PH02Gene11396;PH02Gene12052;PH02Gene19826;PH02Gene19830;PH02Gene19833;PH02Gene19834;PH02Gene21008;PH02Gene22889;PH02Gene25975;PH02Gene26337;PH02Gene29100;PH02Gene32037;PH02Gene32781;PH02Gene50063;PH02Gene50071;PH02Gene51150	K20623+K20623+K20623+K20623+K12639+K09590+K09591+K15639+K20623+K20623+K20623+K20623+K15639+K15639+K12639+K15639+K15639+K09588+K09587+K12639+K09588+K09590
Aminoacyl-tRNA biosynthesis	ko00970	83	199	6478	12921	PH02Gene00670;PH02Gene01587;PH02Gene01660;PH02Gene02967;PH02Gene05100;PH02Gene06258;PH02Gene06271;PH02Gene08640;PH02Gene08960;PH02Gene09486;PH02Gene10992;PH02Gene11110;PH02Gene11500;PH02Gene12588;PH02Gene13235;PH02Gene13506;PH02Gene13517;PH02Gene13583;PH02Gene13873;PH02Gene14122;PH02Gene16816;PH02Gene20176;PH02Gene22437;PH02Gene24878;PH02Gene25583;PH02Gene26887;PH02Gene27410;PH02Gene27691;PH02Gen…	K01889+K01875+K01890+K01885+K01885+K22503+K01886+K01880+K01868+K01874+K01893+K01874+K01874+K01866+K01869+K22503+K01883+K01868+K01870+K01885+K01868+K01892+K00604+K01886+K01881+K01866+K01876+K01889+K04567+K01892+K01870+K01885+K01874+K01893+K01868+K01868+K01875+K01875+K01875+K01868+K01874+K01869+K00604+K01867+K01883+K04567+K01889+K01892+K01866+K01883+K01872+K01868+K01885+K01875+K01881+K01873+K01876+…
Base excision repair	ko03410	65	145	6478	12921	PH02Gene01051;PH02Gene02623;PH02Gene05006;PH02Gene09930;PH02Gene16237;PH02Gene17406;PH02Gene17593;PH02Gene19225;PH02Gene20256;PH02Gene21396;PH02Gene21540;PH02Gene22776;PH02Gene23093;PH02Gene23134;PH02Gene23144;PH02Gene23820;PH02Gene23888;PH02Gene25067;PH02Gene26699;PH02Gene28846;PH02Gene30159;PH02Gene31666;PH02Gene32448;PH02Gene32591;PH02Gene33211;PH02Gene34716;PH02Gene36576;PH02Gene37655;PH02Gen…	K10773+K01247+K10563+K01246+K02327+K01247+K01246+K01142+K10803+K01142+K01246+K02324+K03505+K01247+K04802+K02326+K01246+K10563+K10747+K01246+K02324+K04802+K03504+K04802+K02326+K03512+K02324+K10563+K01246+K02324+K03512+K03648+K02324+K03512+K04802+K10563+K02324+K02335+K02327+K04802+K04802+K02324+K10563+K01247+K02324+K01247+K02335+K02335+K04802+K02335+K02335+K02327+K02324+K01142+K04799+K02324+K02335+…
Oxidative phosphorylation	ko00190	126	282	6478	12921	PH02Gene00103;PH02Gene00153;PH02Gene00196;PH02Gene02433;PH02Gene02854;PH02Gene04941;PH02Gene05483;PH02Gene07474;PH02Gene08477;PH02Gene08671;PH02Gene10403;PH02Gene10630;PH02Gene11419;PH02Gene11682;PH02Gene11935;PH02Gene11967;PH02Gene11979;PH02Gene12921;PH02Gene13462;PH02Gene13692;PH02Gene14370;PH02Gene15576;PH02Gene15992;PH02Gene16771;PH02Gene17140;PH02Gene17726;PH02Gene18329;PH02Gene18330;PH02Gen…	K02137+K02109+K00411+K02150+K00417+K02154+K01535+K01507+K03943+K02144+K01535+K02267+K02115+K01535+K01535+K02115+K02146+K02150+K03963+K02149+K02149+K02137+K01535+K02137+K02147+K02155+K01535+K01535+K02260+K02136+K03963+K02150+K01535+K03943+K01535+K00417+K03942+K01507+K02115+K02260+K02145+K01535+K02155+K02267+K03943+K02115+K02155+K02259+K01535+K03966+K02145+K02109+K02155+K02267+K01535+K03661+K02137+…
beta-Alanine metabolism	ko00410	53	107	6478	12921	PH02Gene02028;PH02Gene02159;PH02Gene02951;PH02Gene03047;PH02Gene03291;PH02Gene04032;PH02Gene04864;PH02Gene05313;PH02Gene05409;PH02Gene07774;PH02Gene08122;PH02Gene08898;PH02Gene16239;PH02Gene16240;PH02Gene16969;PH02Gene18377;PH02Gene20843;PH02Gene22785;PH02Gene22988;PH02Gene24183;PH02Gene24580;PH02Gene26282;PH02Gene27148;PH02Gene27283;PH02Gene28281;PH02Gene29324;PH02Gene29326;PH02Gene29790;PH02Gen…	K00128+K01580+K05605+K14085+K00276+K00276+K00207+K00128+K00207+K01692+K00128+K01918+K00128+K00128+K12259+K01580+K00232+K01580+K14085+K14085+K00232+K00276+K23146+K00232+K00232+K00128+K00128+K00128+K14085+K01580+K17839+K00128+K01464+K05605+K17839+K00232+K00128+K00232+K00207+K01580+K05605+K00232+K00128+K14085+K13366+K00128+K00128+K14085+K00232+K01578+K00232+K23146+K05605
Ubiquitin mediated proteolysis	ko04120	150	331	6478	12921	PH02Gene00049;PH02Gene00892;PH02Gene01379;PH02Gene01571;PH02Gene01583;PH02Gene02122;PH02Gene02702;PH02Gene03151;PH02Gene03701;PH02Gene03800;PH02Gene04274;PH02Gene04390;PH02Gene05338;PH02Gene05535;PH02Gene06452;PH02Gene06906;PH02Gene07530;PH02Gene07653;PH02Gene07655;PH02Gene08296;PH02Gene10813;PH02Gene10821;PH02Gene12224;PH02Gene13048;PH02Gene13224;PH02Gene13788;PH02Gene14663;PH02Gene15179;PH02Gen…	K03178+K03364+K10580+K10590+K10590+K08770+K10580+K10575+K06689+K08770+K10580+K10590+K03094+K06689+K03869+K02927+K10610+K09561+K06689+K10609+K04506+K10581+K06688+K10685+K04506+K03364+K03094+K10573+K10570+K10688+K10588+K03347+K03094+K03094+K03094+K03352+K10144+K03178+K03353+K02977+K04506+K04506+K03352+K06689+K10143+K03353+K10581+K03094+K02927+K02927+K02927+K03872+K03364+K10577+K10599+K10573+K10573+…
Peroxisome	ko04146	96	233	6478	12921	PH02Gene03481;PH02Gene04338;PH02Gene05333;PH02Gene05800;PH02Gene05899;PH02Gene05966;PH02Gene07824;PH02Gene08365;PH02Gene08791;PH02Gene08937;PH02Gene09317;PH02Gene09318;PH02Gene09642;PH02Gene09643;PH02Gene12451;PH02Gene14524;PH02Gene14963;PH02Gene16510;PH02Gene17336;PH02Gene18274;PH02Gene19712;PH02Gene19975;PH02Gene20324;PH02Gene20843;PH02Gene23350;PH02Gene24580;PH02Gene25211;PH02Gene27283;PH02Gen…	K13354+K01897+K13347+K12663+K07513+K13356+K13356+K01897+K13354+K03781+K13356+K13356+K13344+K11517+K03781+K00031+K00106+K13346+K00031+K07513+K01897+K04565+K13337+K00232+K13356+K00232+K01897+K00232+K13343+K00232+K01897+K13339+K12261+K13356+K04565+K01897+K13336+K01897+K11517+K13354+K01640+K04564+K13348+K04565+K13356+K07513+K00031+K13342+K13338+K00232+K12663+K13347+K12663+K01897+K00232+K13341+K13356+…
Lysine degradation	ko00310	55	113	6478	12921	PH02Gene02028;PH02Gene03047;PH02Gene05313;PH02Gene07287;PH02Gene07774;PH02Gene07790;PH02Gene08122;PH02Gene09953;PH02Gene14149;PH02Gene16078;PH02Gene16239;PH02Gene16240;PH02Gene16596;PH02Gene17023;PH02Gene18739;PH02Gene19660;PH02Gene22988;PH02Gene24183;PH02Gene25316;PH02Gene26804;PH02Gene28338;PH02Gene29255;PH02Gene29324;PH02Gene29326;PH02Gene29517;PH02Gene29790;PH02Gene29988;PH02Gene30340;PH02Gen…	K00128+K14085+K00128+K11420+K01692+K11430+K00128+K11426+K18826+K00658+K00128+K00128+K11426+K11420+K00626+K00626+K14085+K14085+K00382+K11420+K11423+K00382+K00128+K00128+K00382+K00128+K11426+K00658+K14085+K00382+K00382+K00128+K00658+K11420+K11423+K11420+K11420+K00128+K00658+K11420+K00626+K11420+K11426+K00382+K00128+K11420+K11420+K14157+K14157+K11420+K14085+K00128+K00128+K14085+K00382
Glycerolipid metabolism	ko00561	121	211	6478	12921	PH02Gene00483;PH02Gene01495;PH02Gene02028;PH02Gene03047;PH02Gene03510;PH02Gene05313;PH02Gene05664;PH02Gene07142;PH02Gene07405;PH02Gene07711;PH02Gene08122;PH02Gene08209;PH02Gene10134;PH02Gene11418;PH02Gene11463;PH02Gene12369;PH02Gene12472;PH02Gene14833;PH02Gene14834;PH02Gene16239;PH02Gene16240;PH02Gene16754;PH02Gene17125;PH02Gene17831;PH02Gene17976;PH02Gene18306;PH02Gene18814;PH02Gene19821;PH02Gen…	K00864+K13519+K00128+K14085+K09480+K00128+K13508+K00901+K13508+K13508+K00128+K11155+K13508+K00002+K09480+K13508+K01054+K07407+K07407+K00128+K00128+K13508+K11155+K00901+K07407+K13508+K03715+K09480+K00901+K18693+K09480+K14085+K01054+K00901+K14085+K15728+K00901+K00864+K00128+K00128+K13508+K00128+K14085+K00901+K14674+K00901+K18693+K22848+K07407+K00128+K13513+K09480+K13508+K07407+K07407+K18693+K06119+…
Carotenoid biosynthesis	ko00906	39	82	6478	12921	PH02Gene00605;PH02Gene00881;PH02Gene01609;PH02Gene01973;PH02Gene03757;PH02Gene07325;PH02Gene07581;PH02Gene08292;PH02Gene09283;PH02Gene10944;PH02Gene15116;PH02Gene19259;PH02Gene22046;PH02Gene22049;PH02Gene22570;PH02Gene23492;PH02Gene24269;PH02Gene25439;PH02Gene30313;PH02Gene30554;PH02Gene30643;PH02Gene32841;PH02Gene34591;PH02Gene34616;PH02Gene35108;PH02Gene35481;PH02Gene36842;PH02Gene38425;PH02Gen…	K15746+K15746+K09837+K17912+K09843+K06443+K09840+K09840+K02291+K15747+K17913+K09843+K09840+K09843+K15746+K09843+K17912+K17911+K02291+K09840+K09842+K09840+K15746+K17913+K15746+K06443+K17911+K09840+K09840+K17911+K06443+K06444+K02291+K09840+K09842+K09842+K09835+K06443+K09842
Tryptophan metabolism	ko00380	81	153	6478	12921	PH02Gene02028;PH02Gene03047;PH02Gene03293;PH02Gene05313;PH02Gene07774;PH02Gene08122;PH02Gene08937;PH02Gene09169;PH02Gene09483;PH02Gene12451;PH02Gene12605;PH02Gene13183;PH02Gene15375;PH02Gene16078;PH02Gene16203;PH02Gene16239;PH02Gene16240;PH02Gene16821;PH02Gene17054;PH02Gene18551;PH02Gene18739;PH02Gene18809;PH02Gene19510;PH02Gene19660;PH02Gene22988;PH02Gene24183;PH02Gene25316;PH02Gene26872;PH02Gen…	K00128+K14085+K23947+K00128+K01692+K00128+K03781+K11816+K01593+K03781+K01593+K11816+K11816+K00658+K11816+K00128+K00128+K11816+K01426+K23947+K00626+K11816+K22588+K00626+K14085+K14085+K00382+K01593+K01593+K01593+K16903+K00382+K00128+K00128+K00382+K00128+K11816+K00658+K14085+K22588+K00382+K11816+K01593+K01593+K00382+K11816+K00128+K01426+K01426+K01426+K11816+K00658+K01426+K01426+K01426+K01593+K11816+…
Valine, leucine and isoleucine biosynthesis	ko00290	28	70	6478	12921	PH02Gene05523;PH02Gene06250;PH02Gene08798;PH02Gene13344;PH02Gene23652;PH02Gene23732;PH02Gene26720;PH02Gene27245;PH02Gene28326;PH02Gene28809;PH02Gene30840;PH02Gene33157;PH02Gene34179;PH02Gene34344;PH02Gene34752;PH02Gene38914;PH02Gene39120;PH02Gene45028;PH02Gene46656;PH02Gene48227;PH02Gene49720;Phyllostachys_edulis_newGene_104590;Phyllostachys_edulis_newGene_125665;Phyllostachys_edulis_newGene_2129…	K00053+K00053+K00052+K00053+K00052+K01653+K00826+K01652+K01653+K00053+K00053+K01687+K01653+K01653+K01703+K00053+K01653+K01652+K00053+K00052+K01704+K01687+K00053+K00826+K01687+K00826+K01687+K01687
Autophagy - other	ko04136	44	93	6478	12921	PH02Gene00214;PH02Gene09869;PH02Gene11471;PH02Gene12244;PH02Gene12751;PH02Gene15783;PH02Gene21230;PH02Gene22631;PH02Gene23056;PH02Gene24437;PH02Gene26866;PH02Gene28158;PH02Gene28231;PH02Gene31140;PH02Gene32048;PH02Gene33580;PH02Gene34562;PH02Gene36710;PH02Gene38264;PH02Gene38544;PH02Gene40662;PH02Gene44558;Phyllostachys_edulis_newGene_114440;Phyllostachys_edulis_newGene_114441;Phyllostachys_eduli…	K08269+K17606+K08331+K08341+K08341+K04382+K17908+K19730+K04382+K17888+K19730+K17906+K00914+K08339+K17606+K07204+K08330+K08334+K07204+K04382+K04382+K07203+K08333+K08333+K08333+K07204+K04382+K08331+K07204+K07203+K08330+K07204+K08331+K08331+K08331+K08331+K00914+K07203+K07203+K07203+K08333+K08333+K07204+K08336
N-Glycan biosynthesis	ko00510	47	114	6478	12921	PH02Gene03698;PH02Gene03814;PH02Gene04749;PH02Gene05768;PH02Gene06032;PH02Gene06047;PH02Gene06073;PH02Gene07246;PH02Gene08009;PH02Gene09416;PH02Gene10165;PH02Gene11172;PH02Gene12386;PH02Gene13578;PH02Gene13773;PH02Gene15119;PH02Gene17113;PH02Gene18980;PH02Gene19004;PH02Gene19541;PH02Gene19542;PH02Gene23560;PH02Gene24466;PH02Gene24467;PH02Gene24808;PH02Gene25473;PH02Gene27462;PH02Gene29049;PH02Gen…	K09659+K07441+K00737+K01228+K12668+K00721+K00729+K01228+K07151+K12667+K01230+K09659+K03848+K12667+K07151+K07151+K12668+K12666+K01228+K03842+K03842+K07252+K03850+K03850+K12669+K12666+K03847+K12668+K23741+K07151+K12666+K07151+K01230+K03842+K12666+K01228+K03848+K12666+K12666+K12669+K12666+K00726+K07151+K01230+K01230+K12666+K03843
Pentose phosphate pathway	ko00030	68	165	6478	12921	PH02Gene01092;PH02Gene01289;PH02Gene02927;PH02Gene03244;PH02Gene04871;PH02Gene07328;PH02Gene08036;PH02Gene08200;PH02Gene09148;PH02Gene09907;PH02Gene10244;PH02Gene11326;PH02Gene12322;PH02Gene13154;PH02Gene13843;PH02Gene14943;PH02Gene15658;PH02Gene16337;PH02Gene16868;PH02Gene19053;PH02Gene19105;PH02Gene19912;PH02Gene21134;PH02Gene21135;PH02Gene22834;PH02Gene23228;PH02Gene23381;PH02Gene24841;PH02Gen…	K00895+K01810+K00615+K00036+K00895+K00895+K00850+K00850+K00895+K01835+K00948+K00036+K01623+K01807+K01810+K00850+K01835+K00850+K01783+K00895+K00036+K01810+K00850+K00850+K00895+K00851+K01810+K00850+K00850+K00033+K00850+K00033+K00036+K00850+K00850+K00036+K00895+K00948+K00036+K00948+K01783+K03841+K00850+K00036+K01623+K01057+K01835+K01057+K01835+K00895+K00036+K00033+K00850+K03841+K00895+K00895+K00036+…
Fatty acid metabolism	ko01212	103	198	6478	12921	PH02Gene00502;PH02Gene00781;PH02Gene01150;PH02Gene02287;PH02Gene02895;PH02Gene03760;PH02Gene04338;PH02Gene04523;PH02Gene05757;PH02Gene05899;PH02Gene07774;PH02Gene07862;PH02Gene08365;PH02Gene09578;PH02Gene10596;PH02Gene11239;PH02Gene12258;PH02Gene12259;PH02Gene12260;PH02Gene12261;PH02Gene12498;PH02Gene13998;PH02Gene18274;PH02Gene18354;PH02Gene18739;PH02Gene19500;PH02Gene19660;PH02Gene19712;PH02Gen…	K00648+K18660+K00059+K09458+K01074+K00059+K01897+K10251+K03921+K07513+K01692+K03921+K01897+K09458+K09458+K10527+K03921+K03921+K03921+K03921+K10781+K10251+K07513+K10251+K00626+K03921+K00626+K01897+K10781+K00232+K03921+K00232+K01897+K10527+K00059+K00232+K10251+K18660+K00232+K10703+K10527+K11262+K01897+K10251+K10251+K03921+K03921+K00208+K00059+K10527+K00059+K00059+K00059+K01897+K00059+K01897+K10781+…
Glycosphingolipid biosynthesis - globo and isoglobo series	ko00603	17	26	6478	12921	PH02Gene02092;PH02Gene09766;PH02Gene14833;PH02Gene14834;PH02Gene17976;PH02Gene27106;PH02Gene32273;PH02Gene36374;PH02Gene36375;PH02Gene43257;PH02Gene51297;Phyllostachys_edulis_newGene_162030;Phyllostachys_edulis_newGene_228432;Phyllostachys_edulis_newGene_228433;Phyllostachys_edulis_newGene_309935;Phyllostachys_edulis_newGene_314344;Phyllostachys_edulis_newGene_87064	K01988+K01988+K07407+K07407+K07407+K12373+K07407+K07407+K07407+K12373+K07407+K12373+K07407+K07407+K12373+K12373+K07407
Other types of O-glycan biosynthesis	ko00514	13	30	6478	12921	PH02Gene04848;PH02Gene12219;PH02Gene16555;PH02Gene30925;PH02Gene33195;PH02Gene34498;PH02Gene34822;PH02Gene36396;PH02Gene37638;PH02Gene47357;Phyllostachys_edulis_newGene_271260;Phyllostachys_edulis_newGene_382781;Phyllostachys_edulis_newGene_403832	K09667+K20782+K09667+K20782+K20783+K09667+K09667+K09667+K09667+K20784+K09667+K09667+K20781
Taurine and hypotaurine metabolism	ko00430	10	19	6478	12921	PH02Gene02159;PH02Gene02204;PH02Gene18377;PH02Gene18378;PH02Gene22785;PH02Gene30597;PH02Gene46571;PH02Gene47320;PH02Gene47321;Phyllostachys_edulis_newGene_141691	K01580+K18592+K01580+K18592+K01580+K01580+K18592+K18592+K18592+K01580
Glycosphingolipid biosynthesis - lacto and neolacto series	ko00601	2	2	6478	12921	PH02Gene02092;PH02Gene09766	K01988+K01988
Linoleic acid metabolism	ko00591	14	29	6478	12921	PH02Gene00435;PH02Gene10309;PH02Gene12522;PH02Gene12524;PH02Gene13921;PH02Gene18247;PH02Gene18248;PH02Gene18249;PH02Gene27269;PH02Gene27270;PH02Gene31441;PH02Gene33719;PH02Gene47636;PH02Gene51050	K15718+K00454+K15718+K15718+K01047+K15718+K15718+K15718+K15718+K15718+K14674+K15718+K00454+K15718
Phenylpropanoid biosynthesis	ko00940	297	433	6478	12921	PH02Gene00244;PH02Gene00245;PH02Gene00246;PH02Gene00248;PH02Gene00439;PH02Gene00465;PH02Gene00630;PH02Gene00675;PH02Gene00908;PH02Gene00909;PH02Gene01076;PH02Gene01110;PH02Gene01874;PH02Gene02121;PH02Gene02696;PH02Gene02731;PH02Gene02735;PH02Gene03303;PH02Gene03593;PH02Gene03806;PH02Gene03956;PH02Gene04325;PH02Gene04612;PH02Gene04614;PH02Gene04686;PH02Gene04687;PH02Gene04778;PH02Gene04803;PH02Gen…	K00430+K00430+K00430+K00430+K00430+K00430+K00430+K00430+K00430+K00430+K00430+K00430+K00430+K00430+K09753+K00430+K00430+K01188+K01904+K00430+K01904+K00430+K01188+K01188+K01188+K01188+K00083+K09753+K01904+K00430+K00430+K00430+K00430+K00588+K09753+K09753+K00430+K09753+K00430+K00430+K01188+K00430+K00430+K00430+K00430+K00430+K01188+K01188+K00430+K00430+K01904+K00430+K05349+K00430+K00430+K00430+K09753+…
Benzoxazinoid biosynthesis	ko00402	4	8	6478	12921	PH02Gene11848;PH02Gene30037;PH02Gene33050;PH02Gene37794	K13222+K13223+K13227+K13227
Flavone and flavonol biosynthesis	ko00944	3	8	6478	12921	PH02Gene07651;PH02Gene20053;PH02Gene47303	K22772+K05280+K13083
Other glycan degradation	ko00511	28	59	6478	12921	PH02Gene05001;PH02Gene11263;PH02Gene11264;PH02Gene19183;PH02Gene21472;PH02Gene23086;PH02Gene27106;PH02Gene30702;PH02Gene39119;PH02Gene41420;PH02Gene42287;PH02Gene42715;PH02Gene43257;PH02Gene44093;PH02Gene44192;PH02Gene49886;PH02Gene51332;Phyllostachys_edulis_newGene_116079;Phyllostachys_edulis_newGene_162030;Phyllostachys_edulis_newGene_172797;Phyllostachys_edulis_newGene_209523;Phyllostachys_edu…	K01227+K01191+K01191+K17108+K12309+K01206+K12373+K15923+K01190+K01191+K01227+K17108+K12373+K01227+K15923+K17108+K01191+K15923+K12373+K01227+K01191+K15923+K01191+K12373+K12373+K01227+K12309+K01227
Synthesis and degradation of ketone bodies	ko00072	10	17	6478	12921	PH02Gene00923;PH02Gene17091;PH02Gene17684;PH02Gene18739;PH02Gene19660;PH02Gene21584;PH02Gene37687;PH02Gene41554;PH02Gene48866;Phyllostachys_edulis_newGene_359770	K01641+K01641+K01641+K00626+K00626+K01641+K01641+K01640+K00626+K01640
Cutin, suberine and wax biosynthesis	ko00073	49	75	6478	12921	PH02Gene00516;PH02Gene03169;PH02Gene04851;PH02Gene05796;PH02Gene05966;PH02Gene07311;PH02Gene07710;PH02Gene07824;PH02Gene09317;PH02Gene09318;PH02Gene10985;PH02Gene11610;PH02Gene16499;PH02Gene18828;PH02Gene19195;PH02Gene19196;PH02Gene20351;PH02Gene23350;PH02Gene26714;PH02Gene26801;PH02Gene27008;PH02Gene27136;PH02Gene30440;PH02Gene33326;PH02Gene33762;PH02Gene34487;PH02Gene34534;PH02Gene37763;PH02Gen…	K15398+K21995+K17991+K15400+K13356+K17991+K15401+K13356+K13356+K13356+K15404+K15402+K15402+K21995+K15404+K15404+K15398+K13356+K15398+K15403+K15404+K21995+K15402+K15402+K15400+K13356+K17991+K20495+K15404+K15404+K15398+K15398+K13356+K15402+K15402+K15400+K15404+K13356+K13356+K13356+K15404+K15403+K17991+K15404+K15404+K13356+K15402+K13356+K17991
Steroid biosynthesis	ko00100	51	90	6478	12921	PH02Gene01789;PH02Gene04139;PH02Gene04432;PH02Gene13515;PH02Gene14310;PH02Gene14338;PH02Gene14342;PH02Gene16255;PH02Gene18862;PH02Gene22726;PH02Gene23358;PH02Gene26346;PH02Gene27858;PH02Gene27859;PH02Gene28604;PH02Gene28688;PH02Gene29274;PH02Gene29384;PH02Gene31441;PH02Gene31974;PH02Gene36303;PH02Gene36519;PH02Gene37397;PH02Gene37842;PH02Gene40224;PH02Gene41283;PH02Gene42730;PH02Gene42817;PH02Gen…	K14424+K00227+K23558+K01052+K01052+K01853+K01853+K14423+K00511+K14423+K00222+K00801+K00801+K00801+K00801+K08242+K00511+K01853+K14674+K09832+K08246+K14424+K00222+K09828+K08242+K14423+K09832+K09832+K00801+K05917+K01052+K00511+K00559+K23558+K09828+K08242+K09828+K08242+K00511+K00801+K00559+K23558+K01052+K01052+K01052+K00213+K01853+K14423+K01052+K00559+K23558
Galactose metabolism	ko00052	95	158	6478	12921	PH02Gene00392;PH02Gene02209;PH02Gene02780;PH02Gene05641;PH02Gene06194;PH02Gene06290;PH02Gene08036;PH02Gene08200;PH02Gene08516;PH02Gene08731;PH02Gene09907;PH02Gene10060;PH02Gene10062;PH02Gene10661;PH02Gene14833;PH02Gene14834;PH02Gene14943;PH02Gene15132;PH02Gene15658;PH02Gene16337;PH02Gene16676;PH02Gene16851;PH02Gene16852;PH02Gene16855;PH02Gene17976;PH02Gene19373;PH02Gene21134;PH02Gene21135;PH02Gen…	K01193+K01785+K12447+K00963+K01193+K00844+K00850+K00850+K01785+K00965+K01835+K01785+K01785+K06617+K07407+K07407+K00850+K00844+K01835+K00850+K18819+K01193+K01193+K01193+K07407+K01784+K00850+K00850+K12309+K12447+K00850+K00850+K18819+K01193+K06617+K00850+K18819+K00850+K00844+K00850+K01784+K01193+K07407+K18819+K01784+K07407+K07407+K18819+K01190+K18819+K18819+K00850+K06617+K00844+K01187+K01784+K06611+…
Spliceosome	ko03040	227	520	6478	12921	PH02Gene00120;PH02Gene00162;PH02Gene00168;PH02Gene01690;PH02Gene01867;PH02Gene02241;PH02Gene02353;PH02Gene02833;PH02Gene03088;PH02Gene03468;PH02Gene04298;PH02Gene04626;PH02Gene04833;PH02Gene04981;PH02Gene05009;PH02Gene05378;PH02Gene05984;PH02Gene06078;PH02Gene06175;PH02Gene06328;PH02Gene07760;PH02Gene07830;PH02Gene08319;PH02Gene08450;PH02Gene09066;PH02Gene09269;PH02Gene09417;PH02Gene09674;PH02Gen…	K12813+K03283+K03283+K12876+K12812+K12812+K12818+K12868+K03283+K12826+K12876+K12836+K11098+K03283+K12845+K12873+K12885+K03283+K12870+K12823+K12820+K12828+K12885+K11096+K12821+K12890+K12823+K12893+K11099+K12623+K12896+K12859+K12621+K12836+K12815+K12733+K12823+K12870+K13025+K12831+K13098+K12896+K12826+K12837+K12874+K12817+K12900+K12817+K12881+K12820+K12868+K03283+K03283+K11096+K03283+K11096+K12827+…
Photosynthesis - antenna proteins	ko00196	14	34	6478	12921	PH02Gene10326;PH02Gene13626;PH02Gene18015;PH02Gene18154;PH02Gene27441;PH02Gene40045;PH02Gene40983;PH02Gene45538;PH02Gene47533;PH02Gene49412;PH02Gene49444;PH02Gene49474;PH02Gene51449;Phyllostachys_edulis_newGene_16268	K08909+K14172+K08911+K08907+K08912+K08912+K08911+K08912+K08916+K08912+K08912+K08912+K08912+K08913
Lipoic acid metabolism	ko00785	7	18	6478	12921	PH02Gene11960;PH02Gene12852;PH02Gene15944;PH02Gene39683;PH02Gene47963;Phyllostachys_edulis_newGene_163394;Phyllostachys_edulis_newGene_210866	K23735+K03644+K23735+K03644+K23735+K23735+K03801
Sphingolipid metabolism	ko00600	47	83	6478	12921	PH02Gene01043;PH02Gene02088;PH02Gene03766;PH02Gene04011;PH02Gene04213;PH02Gene04214;PH02Gene06451;PH02Gene07657;PH02Gene09757;PH02Gene10016;PH02Gene10857;PH02Gene14505;PH02Gene14833;PH02Gene14834;PH02Gene16913;PH02Gene16987;PH02Gene17976;PH02Gene18193;PH02Gene19183;PH02Gene21472;PH02Gene22230;PH02Gene24964;PH02Gene32273;PH02Gene36374;PH02Gene36375;PH02Gene36675;PH02Gene39119;PH02Gene39385;PH02Gen…	K04713+K04712+K04708+K04718+K04713+K04713+K04713+K04713+K04708+K04713+K04708+K04713+K07407+K07407+K04712+K12382+K07407+K04713+K17108+K12309+K04713+K04718+K07407+K07407+K07407+K04718+K01190+K12382+K12349+K12349+K04715+K04712+K04718+K17108+K01634+K00654+K04718+K00654+K17108+K04718+K07407+K07407+K07407+K04708+K12309+K00654+K07407
Carbon fixation in photosynthetic organisms	ko00710	86	211	6478	12921	PH02Gene01969;PH02Gene02613;PH02Gene02927;PH02Gene03238;PH02Gene04191;PH02Gene04577;PH02Gene04989;PH02Gene05321;PH02Gene05896;PH02Gene06538;PH02Gene07696;PH02Gene07927;PH02Gene08184;PH02Gene08190;PH02Gene08435;PH02Gene08625;PH02Gene10386;PH02Gene10606;PH02Gene11124;PH02Gene11332;PH02Gene11705;PH02Gene12322;PH02Gene12335;PH02Gene13120;PH02Gene13154;PH02Gene13970;PH02Gene14211;PH02Gene16481;PH02Gen…	K00025+K00134+K00615+K00134+K00026+K00026+K01803+K00134+K00134+K00051+K01100+K01803+K00029+K00134+K00029+K00051+K01803+K00814+K00134+K00134+K14272+K01623+K00134+K00028+K01807+K00134+K00026+K14272+K01006+K01783+K00927+K00026+K00026+K01803+K00134+K00025+K00134+K01595+K01595+K00028+K00029+K00026+K01803+K01595+K01803+K01595+K00051+K01610+K14455+K01595+K14272+K01783+K03841+K01595+K00134+K00029+K00814+…
Folate biosynthesis	ko00790	28	59	6478	12921	PH02Gene00414;PH02Gene02769;PH02Gene09276;PH02Gene09326;PH02Gene10481;PH02Gene13058;PH02Gene13758;PH02Gene14336;PH02Gene16736;PH02Gene17816;PH02Gene18054;PH02Gene22444;PH02Gene26867;PH02Gene27785;PH02Gene28076;PH02Gene29936;PH02Gene31069;PH02Gene36150;PH02Gene38996;PH02Gene40577;PH02Gene41650;PH02Gene49450;Phyllostachys_edulis_newGene_147537;Phyllostachys_edulis_newGene_155813;Phyllostachys_eduli…	K15376+K13950+K01930+K01633+K13941+K14652+K01307+K03635+K01724+K00079+K20457+K18482+K13998+K15376+K00079+K14652+K13998+K01633+K18482+K03639+K15376+K01930+K13941+K20457+K03639+K14652+K14652+K01930
Limonene and pinene degradation	ko00903	14	20	6478	12921	PH02Gene02028;PH02Gene05313;PH02Gene07774;PH02Gene08122;PH02Gene16239;PH02Gene16240;PH02Gene29324;PH02Gene29326;PH02Gene29790;PH02Gene32530;PH02Gene48243;Phyllostachys_edulis_newGene_236815;Phyllostachys_edulis_newGene_278416;Phyllostachys_edulis_newGene_291179	K00128+K00128+K01692+K00128+K00128+K00128+K00128+K00128+K00128+K00128+K00128+K00128+K00128+K00128
Glycosphingolipid biosynthesis - ganglio series	ko00604	7	17	6478	12921	PH02Gene21472;PH02Gene27106;PH02Gene43257;Phyllostachys_edulis_newGene_162030;Phyllostachys_edulis_newGene_309935;Phyllostachys_edulis_newGene_314344;Phyllostachys_edulis_newGene_352503	K12309+K12373+K12373+K12373+K12373+K12373+K12309
Sulfur metabolism	ko00920	51	127	6478	12921	PH02Gene07377;PH02Gene09137;PH02Gene09733;PH02Gene11311;PH02Gene12763;PH02Gene17127;PH02Gene17738;PH02Gene17739;PH02Gene18027;PH02Gene18235;PH02Gene18698;PH02Gene21533;PH02Gene22630;PH02Gene22756;PH02Gene22764;PH02Gene25795;PH02Gene26620;PH02Gene27443;PH02Gene29201;PH02Gene30070;PH02Gene30401;PH02Gene31520;PH02Gene34048;PH02Gene35059;PH02Gene38784;PH02Gene40233;PH02Gene40847;PH02Gene41603;PH02Gen…	K01739+K01011+K22966+K13811+K05907+K01738+K01739+K01739+K01738+K01738+K17285+K01738+K00387+K17285+K01082+K00387+K00860+K00640+K17285+K00860+K15422+K17285+K01738+K00640+K01739+K05907+K01082+K13811+K01738+K00640+K13034+K17725+K01082+K01738+K13034+K00392+K01739+K13034+K01082+K01082+K13034+K01738+K01738+K01738+K01738+K01011+K01738+K01082+K01011+K01082+K01011
SNARE interactions in vesicular transport	ko04130	42	87	6478	12921	PH02Gene00672;PH02Gene02086;PH02Gene04321;PH02Gene05634;PH02Gene05820;PH02Gene06126;PH02Gene06681;PH02Gene12537;PH02Gene14755;PH02Gene15197;PH02Gene15693;PH02Gene17720;PH02Gene19944;PH02Gene19945;PH02Gene20035;PH02Gene20540;PH02Gene23214;PH02Gene23960;PH02Gene27686;PH02Gene27708;PH02Gene28790;PH02Gene29640;PH02Gene31144;PH02Gene32061;PH02Gene34570;PH02Gene45245;PH02Gene45779;PH02Gene45854;PH02Gen…	K08486+K08492+K08506+K08503+K08515+K08495+K08486+K08486+K08500+K08486+K08517+K08500+K08515+K08515+K08506+K08495+K08489+K08503+K08486+K08506+K08495+K08490+K08503+K08515+K08486+K08497+K08486+K08495+K08486+K08486+K08500+K08500+K08496+K08506+K08500+K08505+K08505+K08517+K08493+K08506+K08507+K08517
Photosynthesis	ko00195	31	103	6478	12921	PH02Gene00153;PH02Gene01385;PH02Gene04280;PH02Gene05522;PH02Gene07024;PH02Gene08266;PH02Gene09620;PH02Gene09630;PH02Gene11419;PH02Gene11967;PH02Gene19415;PH02Gene22620;PH02Gene25033;PH02Gene28446;PH02Gene33457;PH02Gene37335;PH02Gene42240;PH02Gene43892;PH02Gene44511;PH02Gene44826;PH02Gene48975;Phyllostachys_edulis_newGene_113968;Phyllostachys_edulis_newGene_134810;Phyllostachys_edulis_newGene_1864…	K02109+K02695+K02695+K02641+K02636+K03541+K03541+K02698+K02115+K02115+K02639+K08901+K02115+K02115+K02109+K08901+K02115+K08902+K02699+K02639+K02639+K02111+K02689+K02689+K02689+K02639+K02704+K02110+K02641+K02634+K02717
Nitrogen metabolism	ko00910	33	70	6478	12921	PH02Gene00131;PH02Gene00753;PH02Gene01414;PH02Gene02010;PH02Gene02011;PH02Gene05887;PH02Gene09906;PH02Gene13959;PH02Gene14702;PH02Gene16186;PH02Gene18407;PH02Gene18457;PH02Gene21373;PH02Gene22065;PH02Gene25129;PH02Gene26599;PH02Gene26687;PH02Gene27470;PH02Gene31118;PH02Gene31119;PH02Gene36458;PH02Gene37820;PH02Gene38983;PH02Gene45007;PH02Gene47987;PH02Gene48025;PH02Gene48834;PH02Gene50545;Phyllos…	K00264+K01455+K00264+K00261+K00261+K02575+K01915+K01674+K01673+K02575+K00264+K01915+K10534+K01674+K10534+K01915+K10534+K00261+K02575+K02575+K00264+K10534+K00261+K00264+K00262+K00262+K00261+K01915+K00264+K00264+K01673+K00261+K00261
Stilbenoid, diarylheptanoid and gingerol biosynthesis	ko00945	12	26	6478	12921	PH02Gene05833;PH02Gene11151;PH02Gene12695;PH02Gene14684;PH02Gene17241;PH02Gene24448;PH02Gene24931;PH02Gene26288;PH02Gene31189;PH02Gene38832;PH02Gene43237;PH02Gene46700	K00588+K13065+K00588+K16040+K00588+K13065+K13065+K13065+K09754+K00487+K09754+K00588
Porphyrin and chlorophyll metabolism	ko00860	44	109	6478	12921	PH02Gene00303;PH02Gene02967;PH02Gene03219;PH02Gene04482;PH02Gene05100;PH02Gene05142;PH02Gene06285;PH02Gene06841;PH02Gene07647;PH02Gene09983;PH02Gene10414;PH02Gene10441;PH02Gene11349;PH02Gene14122;PH02Gene23339;PH02Gene23340;PH02Gene25454;PH02Gene27203;PH02Gene29646;PH02Gene30262;PH02Gene31239;PH02Gene31263;PH02Gene39091;PH02Gene39434;PH02Gene39893;PH02Gene41916;PH02Gene43754;PH02Gene46716;PH02Gen…	K00218+K01885+K00231+K02492+K01885+K22013+K13071+K13600+K00231+K13071+K01719+K19073+K00231+K01885+K08099+K08099+K03403+K13545+K19054+K02492+K02259+K01885+K18010+K21480+K02259+K02257+K00218+K01885+K01719+K01719+K13071+K22013+K22013+K13600+K02303+K02303+K01772+K01885+K13600+K02259+K13071+K13071+K04040+K13606
Plant hormone signal transduction	ko04075	339	598	6478	12921	PH02Gene00210;PH02Gene00395;PH02Gene00430;PH02Gene00755;PH02Gene01056;PH02Gene01141;PH02Gene01142;PH02Gene01194;PH02Gene01367;PH02Gene01727;PH02Gene01791;PH02Gene02234;PH02Gene02309;PH02Gene02505;PH02Gene02526;PH02Gene02744;PH02Gene02745;PH02Gene02783;PH02Gene02873;PH02Gene02880;PH02Gene03006;PH02Gene03066;PH02Gene03512;PH02Gene03652;PH02Gene03767;PH02Gene03928;PH02Gene04284;PH02Gene04304;PH02Gen…	K14497+K14486+K14504+K14487+K13413+K14484+K14484+K14498+K14486+K14488+K14488+K14504+K14498+K14488+K14432+K14504+K14504+K14488+K14504+K14498+K14500+K14488+K14497+K14496+K14505+K14487+K14484+K12126+K14494+K13464+K14432+K14431+K14491+K13415+K14497+K14486+K14494+K14431+K13946+K14431+K14504+K14432+K14431+K14496+K14504+K13464+K16189+K13463+K14431+K14486+K14490+K14484+K16189+K14488+K14488+K14484+K14484+…
Various types of N-glycan biosynthesis	ko00513	45	94	6478	12921	PH02Gene03814;PH02Gene05234;PH02Gene06032;PH02Gene08009;PH02Gene09416;PH02Gene10165;PH02Gene13578;PH02Gene13773;PH02Gene15119;PH02Gene17113;PH02Gene18980;PH02Gene19258;PH02Gene19541;PH02Gene19542;PH02Gene23491;PH02Gene24692;PH02Gene24808;PH02Gene24998;PH02Gene25473;PH02Gene27106;PH02Gene27462;PH02Gene27968;PH02Gene27973;PH02Gene29049;PH02Gene30035;PH02Gene35404;PH02Gene37673;PH02Gene38305;PH02Gen…	K07441+K14412+K12668+K07151+K12667+K01230+K12667+K07151+K07151+K12668+K12666+K00753+K03842+K03842+K00753+K05531+K12669+K14413+K12666+K12373+K03847+K14412+K14412+K12668+K23741+K07151+K12666+K07151+K01230+K03842+K12666+K12373+K12666+K12373+K12666+K12669+K12666+K00726+K07151+K01230+K12373+K12373+K01230+K12666+K03843
Glycosaminoglycan degradation	ko00531	20	41	6478	12921	PH02Gene11666;PH02Gene14228;PH02Gene21472;PH02Gene25312;PH02Gene26096;PH02Gene27106;PH02Gene28472;PH02Gene32869;PH02Gene39930;PH02Gene39932;PH02Gene41297;PH02Gene41888;PH02Gene43257;PH02Gene49101;PH02Gene50139;Phyllostachys_edulis_newGene_162030;Phyllostachys_edulis_newGene_287521;Phyllostachys_edulis_newGene_309935;Phyllostachys_edulis_newGene_314344;Phyllostachys_edulis_newGene_352503	K07964+K10532+K12309+K10532+K07964+K12373+K07964+K07964+K10532+K10532+K01205+K01205+K12373+K07964+K10532+K12373+K07964+K12373+K12373+K12309
Ether lipid metabolism	ko00565	44	77	6478	12921	PH02Gene00921;PH02Gene01495;PH02Gene02621;PH02Gene02838;PH02Gene05078;PH02Gene05631;PH02Gene08338;PH02Gene10648;PH02Gene11809;PH02Gene13921;PH02Gene13930;PH02Gene16552;PH02Gene20770;PH02Gene20906;PH02Gene21585;PH02Gene25022;PH02Gene26799;PH02Gene26800;PH02Gene27382;PH02Gene27862;PH02Gene27931;PH02Gene29807;PH02Gene29809;PH02Gene30484;PH02Gene31268;PH02Gene31441;PH02Gene31741;PH02Gene31798;PH02Gen…	K01115+K13519+K00993+K13510+K01115+K00993+K01115+K01115+K01114+K01047+K01115+K01114+K01115+K01114+K01115+K13510+K01115+K01115+K01115+K01114+K01115+K01115+K01115+K01115+K01115+K14674+K01114+K01114+K13510+K01115+K01114+K16860+K01115+K01114+K01114+K13510+K13510+K01115+K01114+K01115+K01114+K13510+K01115+K00993
Proteasome	ko03050	112	226	6478	12921	PH02Gene00026;PH02Gene00350;PH02Gene01730;PH02Gene02666;PH02Gene02751;PH02Gene03362;PH02Gene03755;PH02Gene04327;PH02Gene04673;PH02Gene05018;PH02Gene05112;PH02Gene05503;PH02Gene05813;PH02Gene06723;PH02Gene06801;PH02Gene06947;PH02Gene07125;PH02Gene07166;PH02Gene08186;PH02Gene08393;PH02Gene09395;PH02Gene09601;PH02Gene10092;PH02Gene10148;PH02Gene11193;PH02Gene11258;PH02Gene11323;PH02Gene11642;PH02Gen…	K03062+K03062+K03032+K03061+K03062+K03032+K02727+K02726+K02726+K03029+K02731+K02730+K11599+K02734+K06693+K06700+K02732+K02736+K02739+K03035+K02725+K03061+K02735+K03032+K02735+K03029+K03037+K03065+K02734+K02734+K03065+K03064+K02731+K02731+K02734+K03031+K02726+K02726+K02726+K02734+K06699+K02732+K02738+K03066+K03038+K02729+K03028+K02725+K03062+K02725+K03030+K03062+K03066+K03066+K03030+K02731+K02725+…
Monoterpenoid biosynthesis	ko00902	4	12	6478	12921	PH02Gene02074;PH02Gene05613;PH02Gene31256;Phyllostachys_edulis_newGene_91465	K15095+K15086+K15086+K15086
Arginine biosynthesis	ko00220	40	100	6478	12921	PH02Gene01974;PH02Gene02010;PH02Gene02011;PH02Gene03820;PH02Gene07802;PH02Gene09906;PH02Gene10606;PH02Gene11705;PH02Gene13039;PH02Gene13301;PH02Gene16047;PH02Gene16481;PH02Gene18457;PH02Gene24223;PH02Gene24270;PH02Gene26599;PH02Gene27470;PH02Gene35465;PH02Gene36560;PH02Gene37587;PH02Gene38983;PH02Gene44929;PH02Gene47987;PH02Gene48025;PH02Gene48834;PH02Gene50545;Phyllostachys_edulis_newGene_101959…	K00930+K00261+K00261+K01438+K01755+K01915+K00814+K14272+K14682+K14682+K01755+K14272+K01915+K01438+K00930+K01915+K00261+K14455+K13427+K14272+K00261+K00814+K00262+K00262+K00261+K01915+K00620+K00930+K14455+K01438+K01438+K14272+K00814+K14272+K01438+K14455+K00814+K00261+K00261+K01438
Glutathione metabolism	ko00480	148	283	6478	12921	PH02Gene00763;PH02Gene01280;PH02Gene02168;PH02Gene02204;PH02Gene02610;PH02Gene02999;PH02Gene03000;PH02Gene03244;PH02Gene03580;PH02Gene05076;PH02Gene05228;PH02Gene05922;PH02Gene06588;PH02Gene07299;PH02Gene08284;PH02Gene09641;PH02Gene09827;PH02Gene10186;PH02Gene10337;PH02Gene10990;PH02Gene11326;PH02Gene12093;PH02Gene12711;PH02Gene14524;PH02Gene14791;PH02Gene15208;PH02Gene15210;PH02Gene15893;PH02Gen…	K00799+K00799+K22596+K18592+K01919+K00799+K00799+K00036+K00799+K01581+K00434+K00799+K00799+K10808+K00799+K00799+K00434+K00434+K00799+K00383+K00036+K00799+K10807+K00031+K10808+K00799+K00799+K00799+K00799+K00799+K00799+K00799+K10807+K00031+K00799+K00799+K18592+K00799+K00799+K00036+K00432+K00799+K00799+K10807+K10808+K00799+K10807+K00383+K00383+K00383+K01469+K00434+K00033+K00799+K00799+K10808+K00799+…
RNA degradation	ko03018	136	297	6478	12921	PH02Gene00155;PH02Gene00228;PH02Gene00271;PH02Gene00391;PH02Gene00737;PH02Gene01766;PH02Gene02071;PH02Gene02412;PH02Gene02456;PH02Gene02932;PH02Gene03574;PH02Gene05562;PH02Gene05839;PH02Gene06341;PH02Gene06626;PH02Gene06731;PH02Gene06788;PH02Gene07198;PH02Gene07708;PH02Gene07743;PH02Gene08036;PH02Gene08200;PH02Gene08324;PH02Gene08913;PH02Gene09748;PH02Gene10791;PH02Gene10972;PH02Gene12556;PH02Gen…	K13126+K01689+K12581+K11600+K12617+K12606+K12614+K12605+K12587+K12604+K12591+K12605+K12613+K12598+K13126+K12604+K12581+K13126+K01689+K12591+K00850+K00850+K12611+K12590+K12614+K12623+K07573+K12621+K04043+K13126+K12617+K04077+K03681+K13126+K12614+K00850+K12581+K12581+K12619+K01689+K00850+K12614+K12589+K12587+K00962+K04077+K12603+K04077+K00850+K00850+K12581+K04077+K04043+K12603+K03679+K13126+K12586+…
ABC transporters	ko02010	60	106	6478	12921	PH02Gene00141;PH02Gene00207;PH02Gene01713;PH02Gene02211;PH02Gene02694;PH02Gene03263;PH02Gene06567;PH02Gene06568;PH02Gene08206;PH02Gene11162;PH02Gene11380;PH02Gene12564;PH02Gene12565;PH02Gene12567;PH02Gene12568;PH02Gene13678;PH02Gene13683;PH02Gene13684;PH02Gene14886;PH02Gene18770;PH02Gene21420;PH02Gene24658;PH02Gene34686;PH02Gene34687;PH02Gene35123;PH02Gene35485;PH02Gene35504;PH02Gene35826;PH02Gen…	K05658+K05658+K05643+K05658+K05674+K05658+K05658+K05658+K05665+K05658+K05658+K05658+K05658+K05658+K05658+K05658+K05658+K05658+K05658+K05658+K05658+K05658+K05658+K05658+K05658+K05658+K05658+K05658+K05658+K05658+K05658+K05658+K05658+K05665+K05665+K05658+K05658+K05658+K05658+K05658+K05658+K05658+K05658+K05658+K05658+K05658+K05658+K05658+K05658+K05658+K05658+K05658+K05658+K05658+K05658+K05658+K05658+…
Nucleotide excision repair	ko03420	187	327	6478	12921	PH02Gene01902;PH02Gene02716;PH02Gene05296;PH02Gene07530;PH02Gene08296;PH02Gene08760;PH02Gene08972;PH02Gene10036;PH02Gene11283;PH02Gene11637;PH02Gene12717;PH02Gene12879;PH02Gene15176;PH02Gene15239;PH02Gene15499;PH02Gene16237;PH02Gene16961;PH02Gene17630;PH02Gene21224;PH02Gene22776;PH02Gene23093;PH02Gene23144;PH02Gene23820;PH02Gene24308;PH02Gene26031;PH02Gene26699;PH02Gene26902;PH02Gene27261;PH02Gen…	K10755+K10739+K10839+K10610+K10609+K07466+K10739+K07466+K10754+K10842+K10842+K07466+K10756+K10839+K10570+K02327+K07466+K07466+K07466+K02324+K03505+K04802+K02326+K10846+K10839+K10747+K03141+K06634+K03868+K10739+K07466+K02324+K04802+K03504+K04802+K02326+K07466+K02324+K10756+K10570+K02324+K07466+K07466+K07466+K07466+K10839+K02324+K10756+K10755+K07466+K04802+K07466+K07466+K07466+K02324+K07466+K07466+…
Citrate cycle (TCA cycle)	ko00020	105	205	6478	12921	PH02Gene01726;PH02Gene01969;PH02Gene03176;PH02Gene03278;PH02Gene04191;PH02Gene04577;PH02Gene05693;PH02Gene05837;PH02Gene07584;PH02Gene08631;PH02Gene09291;PH02Gene09676;PH02Gene12043;PH02Gene13811;PH02Gene14211;PH02Gene14524;PH02Gene15245;PH02Gene16078;PH02Gene17336;PH02Gene18021;PH02Gene18183;PH02Gene18745;PH02Gene19114;PH02Gene19374;PH02Gene24266;PH02Gene25015;PH02Gene25316;PH02Gene25502;PH02Gen…	K00627+K00025+K00161+K00030+K00026+K00026+K00627+K01681+K00162+K00162+K00627+K00161+K00627+K00627+K00026+K00031+K00627+K00658+K00031+K00026+K00026+K01681+K01648+K01648+K00025+K01900+K00382+K00627+K01648+K00026+K01681+K01900+K00382+K00382+K00627+K00161+K00658+K00382+K00382+K00162+K01610+K01648+K00162+K00164+K00030+K01681+K00658+K00627+K00627+K00627+K00030+K00031+K00162+K00658+K00026+K00627+K00627+…
Tyrosine metabolism	ko00350	62	116	6478	12921	PH02Gene01841;PH02Gene02767;PH02Gene03291;PH02Gene03906;PH02Gene04032;PH02Gene05455;PH02Gene05879;PH02Gene06386;PH02Gene09483;PH02Gene10322;PH02Gene12397;PH02Gene12605;PH02Gene13430;PH02Gene15015;PH02Gene15276;PH02Gene16770;PH02Gene18233;PH02Gene22634;PH02Gene23287;PH02Gene23288;PH02Gene25013;PH02Gene25199;PH02Gene26282;PH02Gene26872;PH02Gene26873;PH02Gene26874;PH02Gene28608;PH02Gene31517;PH02Gen…	K00422+K07253+K00276+K00422+K00276+K00121+K00121+K00815+K01593+K01555+K01557+K01593+K01557+K15849+K00121+K00817+K00121+K01800+K01800+K01800+K00422+K01557+K00276+K01593+K01593+K01593+K00422+K01593+K01593+K00422+K15849+K00001+K18857+K18857+K14455+K01555+K18857+K01800+K15849+K01593+K01800+K07253+K01555+K01555+K01555+K01593+K00121+K00121+K01800+K01557+K00457+K14455+K01555+K01800+K01800+K01555+K00457+…
RNA transport	ko03013	224	487	6478	12921	PH02Gene00083;PH02Gene00090;PH02Gene00155;PH02Gene00733;PH02Gene01349;PH02Gene01461;PH02Gene01690;PH02Gene01867;PH02Gene02015;PH02Gene02033;PH02Gene02241;PH02Gene02356;PH02Gene02756;PH02Gene03367;PH02Gene03519;PH02Gene03572;PH02Gene03638;PH02Gene03639;PH02Gene04298;PH02Gene05610;PH02Gene05863;PH02Gene06124;PH02Gene06488;PH02Gene06626;PH02Gene06657;PH02Gene06826;PH02Gene06827;PH02Gene07154;PH02Gen…	K03231+K03231+K13126+K14290+K03251+K14315+K12876+K12812+K03260+K14290+K12812+K03245+K03262+K14315+K13171+K18655+K05749+K05749+K12876+K03245+K03240+K03257+K03246+K13126+K03260+K14325+K14325+K03240+K13126+K03249+K03680+K03260+K14300+K14290+K07562+K13174+K14292+K14292+K13171+K03537+K14308+K13126+K03254+K14309+K13126+K03248+K05019+K14310+K07936+K02516+K13025+K03238+K03537+K13098+K03236+K03237+K14004+…
Caffeine metabolism	ko00232	2	5	6478	12921	PH02Gene14963;PH02Gene38186	K00106+K00365
Starch and sucrose metabolism	ko00500	252	427	6478	12921	PH02Gene00329;PH02Gene00392;PH02Gene01225;PH02Gene01226;PH02Gene01229;PH02Gene01289;PH02Gene01541;PH02Gene01635;PH02Gene01673;PH02Gene01763;PH02Gene02532;PH02Gene02534;PH02Gene02657;PH02Gene02848;PH02Gene02950;PH02Gene03303;PH02Gene03451;PH02Gene04356;PH02Gene04612;PH02Gene04614;PH02Gene04686;PH02Gene04687;PH02Gene05045;PH02Gene05178;PH02Gene05641;PH02Gene05705;PH02Gene05712;PH02Gene06030;PH02Gen…	K01179+K01193+K01176+K01176+K01176+K01810+K16055+K01087+K01087+K00696+K01176+K01176+K00695+K01176+K01087+K01188+K01087+K01179+K01188+K01188+K01188+K01188+K01176+K01179+K00963+K16055+K00700+K00703+K01193+K00844+K01179+K01214+K01188+K19892+K16055+K01179+K01087+K01087+K01188+K01188+K16055+K00975+K00695+K00695+K01835+K16055+K00703+K00847+K05349+K00695+K01176+K16055+K00975+K16055+K01179+K05349+K13679+…
Fructose and mannose metabolism	ko00051	96	191	6478	12921	PH02Gene00211;PH02Gene01092;PH02Gene02525;PH02Gene03511;PH02Gene04871;PH02Gene04989;PH02Gene05339;PH02Gene06290;PH02Gene07328;PH02Gene07927;PH02Gene08036;PH02Gene08200;PH02Gene09148;PH02Gene10040;PH02Gene10386;PH02Gene12322;PH02Gene12960;PH02Gene12995;PH02Gene13215;PH02Gene13382;PH02Gene14943;PH02Gene15132;PH02Gene16158;PH02Gene16337;PH02Gene17634;PH02Gene17969;PH02Gene19053;PH02Gene21134;PH02Gen…	K00966+K00895+K19355+K00966+K00895+K01803+K01711+K00844+K00895+K01803+K00850+K00850+K00895+K00847+K01803+K01623+K01103+K01711+K01809+K05305+K00850+K00844+K00008+K00850+K01805+K01809+K00895+K00850+K00850+K00895+K01803+K00847+K19355+K00850+K00850+K01809+K00850+K01803+K00966+K00850+K01103+K01803+K00844+K19355+K00850+K01809+K00895+K19355+K19355+K01711+K00847+K00847+K03841+K19355+K19355+K01711+K00850+…
Fatty acid biosynthesis	ko00061	57	121	6478	12921	PH02Gene00502;PH02Gene00781;PH02Gene01150;PH02Gene02287;PH02Gene03760;PH02Gene04338;PH02Gene05757;PH02Gene07862;PH02Gene08365;PH02Gene09578;PH02Gene10596;PH02Gene12258;PH02Gene12259;PH02Gene12260;PH02Gene12261;PH02Gene12498;PH02Gene19500;PH02Gene19712;PH02Gene20262;PH02Gene24080;PH02Gene25211;PH02Gene25940;PH02Gene28211;PH02Gene29224;PH02Gene29371;PH02Gene31584;PH02Gene31588;PH02Gene32268;PH02Gen…	K00648+K18660+K00059+K09458+K00059+K01897+K03921+K03921+K01897+K09458+K09458+K03921+K03921+K03921+K03921+K10781+K03921+K01897+K10781+K03921+K01897+K00059+K18660+K11262+K01897+K03921+K03921+K00208+K00059+K00059+K00059+K00059+K01897+K00059+K01897+K10781+K00648+K11262+K03921+K03921+K03921+K03921+K01897+K10781+K02372+K02372+K09458+K09458+K00645+K00645+K00059+K00059+K00059+K09458+K01897+K01897+K09458
Fatty acid elongation	ko00062	61	97	6478	12921	PH02Gene00646;PH02Gene02895;PH02Gene03898;PH02Gene04523;PH02Gene04838;PH02Gene05292;PH02Gene05497;PH02Gene05867;PH02Gene06927;PH02Gene07184;PH02Gene08111;PH02Gene08522;PH02Gene08523;PH02Gene09171;PH02Gene10988;PH02Gene10989;PH02Gene11241;PH02Gene13998;PH02Gene18354;PH02Gene19062;PH02Gene20318;PH02Gene20796;PH02Gene21033;PH02Gene21384;PH02Gene24324;PH02Gene24901;PH02Gene25383;PH02Gene25435;PH02Gen…	K15397+K01074+K15397+K10251+K15397+K15397+K15397+K15397+K15397+K15397+K15397+K15397+K15397+K15397+K15397+K15397+K15397+K10251+K10251+K15397+K15397+K01068+K15397+K15397+K15397+K15397+K15397+K15397+K15397+K15397+K10251+K10703+K10251+K10251+K15397+K15397+K15397+K15397+K15397+K15397+K15397+K15397+K15397+K15397+K15397+K15397+K15397+K15397+K15397+K15397+K15397+K15397+K15397+K10251+K15397+K10251+K15397+…
Purine metabolism	ko00230	133	305	6478	12921	PH02Gene00293;PH02Gene00355;PH02Gene02887;PH02Gene03563;PH02Gene04574;PH02Gene04773;PH02Gene07299;PH02Gene07407;PH02Gene07763;PH02Gene07852;PH02Gene08311;PH02Gene09842;PH02Gene09907;PH02Gene10244;PH02Gene10575;PH02Gene10726;PH02Gene10727;PH02Gene11311;PH02Gene12272;PH02Gene12313;PH02Gene12711;PH02Gene12817;PH02Gene13585;PH02Gene14791;PH02Gene14918;PH02Gene14963;PH02Gene15658;PH02Gene15836;PH02Gen…	K01466+K00939+K00940+K00873+K01510+K01923+K10808+K00939+K01756+K00764+K00088+K00873+K01835+K00948+K00951+K01952+K01952+K13811+K00873+K00939+K10807+K14641+K01490+K10808+K01513+K00106+K01835+K00759+K00939+K01490+K10807+K00951+K00856+K01952+K00764+K01756+K00951+K00873+K00939+K00939+K00856+K00951+K00764+K10807+K10808+K01939+K00088+K10807+K00764+K00759+K00939+K18532+K01510+K00760+K00860+K01939+K13484+…
Mismatch repair	ko03430	149	251	6478	12921	PH02Gene00281;PH02Gene00282;PH02Gene01902;PH02Gene02716;PH02Gene04735;PH02Gene08760;PH02Gene08972;PH02Gene10036;PH02Gene11283;PH02Gene12879;PH02Gene13809;PH02Gene15176;PH02Gene16237;PH02Gene16961;PH02Gene17630;PH02Gene17855;PH02Gene18737;PH02Gene21224;PH02Gene23093;PH02Gene23144;PH02Gene26028;PH02Gene26699;PH02Gene28835;PH02Gene29871;PH02Gene30543;PH02Gene31666;PH02Gene32448;PH02Gene32591;PH02Gen…	K08736+K08736+K10755+K10739+K10858+K07466+K10739+K07466+K10754+K07466+K08737+K10756+K02327+K07466+K07466+K10746+K10746+K07466+K03505+K04802+K08737+K10747+K10739+K07466+K03111+K04802+K03504+K04802+K07466+K10756+K07466+K07466+K07466+K07466+K07456+K10756+K10755+K07466+K04802+K07466+K07466+K07466+K07466+K07466+K07466+K07466+K02327+K04802+K04802+K07466+K07466+K07466+K08737+K07466+K07466+K07466+K07466+…
Pentose and glucuronate interconversions	ko00040	100	156	6478	12921	PH02Gene00014;PH02Gene00530;PH02Gene02210;PH02Gene02780;PH02Gene05641;PH02Gene06150;PH02Gene08021;PH02Gene08022;PH02Gene09808;PH02Gene10059;PH02Gene10321;PH02Gene10473;PH02Gene11418;PH02Gene11736;PH02Gene12865;PH02Gene12992;PH02Gene13782;PH02Gene14715;PH02Gene14759;PH02Gene16158;PH02Gene16520;PH02Gene16566;PH02Gene16657;PH02Gene16868;PH02Gene17634;PH02Gene17959;PH02Gene18078;PH02Gene19444;PH02Gen…	K01051+K01184+K01051+K12447+K00963+K01728+K01051+K01051+K00012+K01051+K01213+K00012+K00002+K01184+K01184+K01728+K01051+K01051+K01051+K00008+K01051+K01728+K01051+K01783+K01805+K01051+K00012+K01051+K01184+K00012+K00012+K01051+K01051+K01051+K01051+K01051+K01051+K01728+K12447+K01213+K01213+K01213+K01728+K01051+K01051+K01728+K01184+K01213+K01213+K01051+K01051+K01184+K01184+K01051+K01051+K01184+K01051+…
One carbon pool by folate	ko00670	27	66	6478	12921	PH02Gene05779;PH02Gene07644;PH02Gene12312;PH02Gene13384;PH02Gene17898;PH02Gene20255;PH02Gene22437;PH02Gene24160;PH02Gene26867;PH02Gene28029;PH02Gene28782;PH02Gene29163;PH02Gene29723;PH02Gene30742;PH02Gene31069;PH02Gene34766;PH02Gene34952;PH02Gene39008;PH02Gene41315;PH02Gene43587;PH02Gene47103;PH02Gene50268;Phyllostachys_edulis_newGene_167928;Phyllostachys_edulis_newGene_214503;Phyllostachys_eduli…	K00600+K00600+K00600+K00605+K01934+K00605+K00604+K00600+K13998+K00600+K00605+K00297+K00600+K00600+K13998+K00297+K01938+K00600+K00604+K00600+K00601+K00600+K00601+K00602+K00605+K01934+K00605
Diterpenoid biosynthesis	ko00904	28	51	6478	12921	PH02Gene00807;PH02Gene01756;PH02Gene04273;PH02Gene07978;PH02Gene08244;PH02Gene08927;PH02Gene09039;PH02Gene09408;PH02Gene17101;PH02Gene17576;PH02Gene19573;PH02Gene21310;PH02Gene25393;PH02Gene26108;PH02Gene29264;PH02Gene30496;PH02Gene31829;PH02Gene31831;PH02Gene31832;PH02Gene33336;PH02Gene36729;PH02Gene37343;PH02Gene46469;PH02Gene46608;PH02Gene48911;PH02Gene49217;PH02Gene51305;Phyllostachys_edulis_…	K04125+K04121+K04125+K04125+K04125+K05282+K04124+K04121+K04123+K04125+K04125+K05282+K04125+K05282+K04125+K04124+K04123+K04123+K04123+K22639+K04125+K04125+K16085+K04120+K04125+K04120+K04125+K04125
C5-Branched dibasic acid metabolism	ko00660	12	28	6478	12921	PH02Gene08798;PH02Gene23652;PH02Gene23732;PH02Gene27245;PH02Gene28326;PH02Gene34179;PH02Gene34344;PH02Gene34752;PH02Gene39120;PH02Gene45028;PH02Gene48227;PH02Gene49720	K00052+K00052+K01653+K01652+K01653+K01653+K01653+K01703+K01653+K01652+K00052+K01704
Monobactam biosynthesis	ko00261	16	30	6478	12921	PH02Gene01934;PH02Gene09787;PH02Gene11311;PH02Gene12071;PH02Gene14144;PH02Gene15793;PH02Gene18885;PH02Gene21626;PH02Gene21784;PH02Gene34142;PH02Gene41603;Phyllostachys_edulis_newGene_107901;Phyllostachys_edulis_newGene_19912;Phyllostachys_edulis_newGene_29555;Phyllostachys_edulis_newGene_316628;Phyllostachys_edulis_newGene_5171	K01714+K00133+K13811+K00928+K00215+K00133+K00133+K12524+K01714+K12524+K13811+K01714+K00133+K00133+K00133+K00928
Zeatin biosynthesis	ko00908	35	53	6478	12921	PH02Gene00699;PH02Gene01695;PH02Gene04562;PH02Gene06118;PH02Gene08182;PH02Gene13478;PH02Gene13804;PH02Gene14913;PH02Gene15236;PH02Gene15391;PH02Gene15636;PH02Gene17149;PH02Gene20020;PH02Gene20804;PH02Gene20807;PH02Gene20808;PH02Gene26033;PH02Gene29094;PH02Gene29097;PH02Gene29187;PH02Gene29893;PH02Gene30452;PH02Gene31018;PH02Gene31446;PH02Gene32963;PH02Gene33257;PH02Gene33258;PH02Gene33259;PH02Gen…	K00279+K10760+K10760+K00279+K00279+K13495+K10717+K00279+K10717+K10717+K00279+K00279+K10760+K13495+K13495+K13495+K10717+K13496+K13496+K10760+K00279+K00279+K10760+K10760+K13496+K13495+K13495+K13495+K10760+K00279+K13496+K10760+K00279+K00791+K13496
Valine, leucine and isoleucine degradation	ko00280	77	144	6478	12921	PH02Gene00781;PH02Gene00923;PH02Gene02028;PH02Gene02951;PH02Gene03047;PH02Gene04372;PH02Gene04374;PH02Gene04375;PH02Gene05313;PH02Gene05511;PH02Gene05899;PH02Gene07774;PH02Gene08122;PH02Gene16239;PH02Gene16240;PH02Gene17091;PH02Gene17684;PH02Gene18274;PH02Gene18739;PH02Gene19660;PH02Gene20511;PH02Gene21584;PH02Gene22988;PH02Gene23034;PH02Gene24183;PH02Gene25316;PH02Gene26497;PH02Gene26720;PH02Gen…	K18660+K01641+K00128+K05605+K14085+K00253+K00253+K00253+K00128+K00827+K07513+K01692+K00128+K00128+K00128+K01641+K01641+K07513+K00626+K00626+K00020+K01641+K14085+K00827+K14085+K00382+K00827+K00826+K23146+K18660+K00382+K00128+K00128+K00382+K00128+K14085+K00166+K00382+K01968+K00382+K00128+K00827+K00020+K01968+K00020+K01641+K00249+K01969+K00020+K01640+K01968+K07513+K05605+K00128+K00626+K00167+K00167+…
Isoquinoline alkaloid biosynthesis	ko00950	24	49	6478	12921	PH02Gene01841;PH02Gene03291;PH02Gene03906;PH02Gene04032;PH02Gene06386;PH02Gene09483;PH02Gene12605;PH02Gene15015;PH02Gene25013;PH02Gene26282;PH02Gene26872;PH02Gene26873;PH02Gene26874;PH02Gene28608;PH02Gene31517;PH02Gene31518;PH02Gene32127;PH02Gene32343;PH02Gene35465;PH02Gene41987;PH02Gene42909;PH02Gene49813;Phyllostachys_edulis_newGene_140469;Phyllostachys_edulis_newGene_333269	K00422+K00276+K00422+K00276+K00815+K01593+K01593+K15849+K00422+K00276+K01593+K01593+K01593+K00422+K01593+K01593+K00422+K15849+K14455+K15849+K01593+K01593+K14455+K14455
Cyanoamino acid metabolism	ko00460	73	133	6478	12921	PH02Gene00467;PH02Gene00753;PH02Gene02204;PH02Gene03303;PH02Gene04612;PH02Gene04614;PH02Gene04686;PH02Gene04687;PH02Gene05779;PH02Gene07146;PH02Gene07644;PH02Gene08382;PH02Gene08650;PH02Gene08660;PH02Gene10265;PH02Gene12143;PH02Gene12312;PH02Gene12833;PH02Gene14099;PH02Gene14100;PH02Gene14101;PH02Gene15951;PH02Gene16577;PH02Gene17477;PH02Gene18378;PH02Gene19972;PH02Gene20050;PH02Gene23433;PH02Gen…	K13051+K01455+K18592+K01188+K01188+K01188+K01188+K01188+K00600+K01188+K00600+K13029+K01188+K01188+K05349+K12153+K00600+K05349+K05349+K05349+K05349+K01188+K12153+K12153+K18592+K05349+K01188+K01188+K00600+K12153+K05350+K00600+K00600+K05350+K05350+K00600+K01188+K13051+K13051+K01188+K01188+K05349+K00600+K01188+K05350+K05350+K05350+K00600+K01188+K05350+K18592+K13029+K18592+K18592+K13034+K01188+K00600+…
Pyruvate metabolism	ko00620	144	271	6478	12921	PH02Gene00352;PH02Gene01726;PH02Gene01969;PH02Gene02028;PH02Gene03047;PH02Gene03176;PH02Gene03563;PH02Gene04191;PH02Gene04521;PH02Gene04577;PH02Gene04746;PH02Gene05313;PH02Gene05691;PH02Gene05693;PH02Gene06538;PH02Gene07584;PH02Gene07806;PH02Gene08122;PH02Gene08184;PH02Gene08435;PH02Gene08625;PH02Gene08631;PH02Gene09291;PH02Gene09676;PH02Gene09842;PH02Gene12043;PH02Gene12272;PH02Gene12400;PH02Gen…	K18881+K00627+K00025+K00128+K14085+K00161+K00873+K00026+K18881+K00026+K18881+K00128+K00016+K00627+K00051+K00162+K01913+K00128+K00029+K00029+K00051+K00162+K00627+K00161+K00873+K00627+K00873+K01069+K00028+K00627+K00026+K00627+K00128+K00128+K01006+K00026+K00026+K00626+K00626+K00016+K00873+K14085+K14085+K00025+K01595+K00382+K01595+K00627+K00028+K00029+K00026+K11262+K00382+K00128+K00128+K00873+K00382+…
Pyrimidine metabolism	ko00240	88	173	6478	12921	PH02Gene01691;PH02Gene02887;PH02Gene03453;PH02Gene04199;PH02Gene04574;PH02Gene04864;PH02Gene05409;PH02Gene07128;PH02Gene07299;PH02Gene12711;PH02Gene12817;PH02Gene12892;PH02Gene14527;PH02Gene14791;PH02Gene14918;PH02Gene16222;PH02Gene16224;PH02Gene17255;PH02Gene17339;PH02Gene18333;PH02Gene19601;PH02Gene21042;PH02Gene21079;PH02Gene21471;PH02Gene22023;PH02Gene22105;PH02Gene22243;PH02Gene22326;PH02Gen…	K01937+K00940+K13800+K01937+K01510+K00207+K00207+K00876+K10808+K10807+K14641+K01489+K01937+K10808+K01513+K00876+K01956+K10807+K01937+K01956+K00876+K13421+K00876+K01489+K01956+K10807+K01937+K10808+K10807+K01510+K00876+K13998+K01937+K10808+K00609+K01240+K01956+K00876+K13998+K01520+K13800+K00943+K01489+K01937+K01937+K00876+K10808+K00943+K01240+K01464+K10808+K10808+K00943+K16904+K10808+K00943+K01510+…
DNA replication	ko03030	197	316	6478	12921	PH02Gene00654;PH02Gene01902;PH02Gene02307;PH02Gene02716;PH02Gene03290;PH02Gene04033;PH02Gene07388;PH02Gene08760;PH02Gene08972;PH02Gene09120;PH02Gene09281;PH02Gene10036;PH02Gene11283;PH02Gene12380;PH02Gene12879;PH02Gene14947;PH02Gene15176;PH02Gene16237;PH02Gene16961;PH02Gene17630;PH02Gene18328;PH02Gene19092;PH02Gene20150;PH02Gene21224;PH02Gene22776;PH02Gene23093;PH02Gene23144;PH02Gene23820;PH02Gen…	K10742+K10755+K10742+K10739+K10744+K10744+K02210+K07466+K10739+K10745+K10745+K07466+K10754+K02210+K07466+K02685+K10756+K02327+K07466+K07466+K02209+K02212+K02320+K07466+K02324+K03505+K04802+K02326+K10747+K10739+K07466+K02324+K03111+K04802+K03504+K04802+K02326+K02540+K02321+K07466+K02541+K02540+K02324+K10756+K02324+K07466+K02212+K07466+K07466+K07466+K02212+K02684+K02324+K10756+K10755+K07466+K04802+…
Homologous recombination	ko03440	211	359	6478	12921	PH02Gene02716;PH02Gene06248;PH02Gene07810;PH02Gene08487;PH02Gene08760;PH02Gene08972;PH02Gene09372;PH02Gene09464;PH02Gene10036;PH02Gene12867;PH02Gene12879;PH02Gene14185;PH02Gene15565;PH02Gene16237;PH02Gene16780;PH02Gene16961;PH02Gene17484;PH02Gene17630;PH02Gene18576;PH02Gene18823;PH02Gene19474;PH02Gene19644;PH02Gene21113;PH02Gene21224;PH02Gene22306;PH02Gene23093;PH02Gene26507;PH02Gene26541;PH02Gen…	K10739+K10871+K10728+K10683+K07466+K10739+K10880+K03553+K07466+K11864+K07466+K10901+K08775+K02327+K03655+K07466+K10875+K07466+K10870+K10728+K20776+K04728+K11864+K07466+K10879+K03505+K10901+K10901+K10901+K10739+K03553+K07466+K10867+K03111+K03504+K10901+K07466+K10901+K15362+K10875+K07466+K10875+K07466+K07466+K07466+K04482+K07466+K07466+K07466+K03655+K10901+K07466+K10683+K07466+K03655+K03655+K07466+…
Phenylalanine, tyrosine and tryptophan biosynthesis	ko00400	58	134	6478	12921	PH02Gene00760;PH02Gene00875;PH02Gene01028;PH02Gene01709;PH02Gene03475;PH02Gene04291;PH02Gene05886;PH02Gene06033;PH02Gene06353;PH02Gene06386;PH02Gene06738;PH02Gene06739;PH02Gene11851;PH02Gene11852;PH02Gene12904;PH02Gene14660;PH02Gene15015;PH02Gene15861;PH02Gene16376;PH02Gene16770;PH02Gene21279;PH02Gene21577;PH02Gene21921;PH02Gene23107;PH02Gene25114;PH02Gene27690;PH02Gene27922;PH02Gene32343;PH02Gen…	K01850+K00766+K00891+K15227+K01657+K05359+K05359+K01657+K01657+K00815+K01695+K01695+K01695+K01695+K01626+K01735+K15849+K05359+K01658+K00817+K05359+K05359+K05359+K01850+K01626+K13832+K01626+K15849+K00891+K14455+K05359+K00891+K15227+K15849+K01609+K01817+K01626+K01609+K05359+K05359+K01695+K14455+K01850+K01850+K00891+K01657+K01695+K00891+K05359+K00817+K01658+K14455+K15227+K01626+K01626+K01850+K01817+…
Basal transcription factors	ko03022	52	108	6478	12921	PH02Gene05124;PH02Gene10080;PH02Gene10477;PH02Gene11423;PH02Gene11637;PH02Gene12717;PH02Gene13854;PH02Gene13870;PH02Gene14215;PH02Gene14909;PH02Gene15080;PH02Gene19796;PH02Gene19874;PH02Gene20667;PH02Gene24259;PH02Gene26032;PH02Gene26902;PH02Gene27261;PH02Gene31527;PH02Gene32979;PH02Gene35369;PH02Gene36009;PH02Gene36975;PH02Gene39066;PH02Gene39779;PH02Gene40170;PH02Gene40173;PH02Gene40374;PH02Gen…	K03124+K03123+K14649+K03126+K10842+K10842+K03130+K03125+K03132+K03122+K03129+K03124+K03125+K03126+K03124+K03125+K03141+K06634+K03124+K03131+K03131+K03125+K03122+K03124+K03133+K03138+K03138+K03129+K03124+K03122+K03120+K03123+K03123+K03120+K03141+K03125+K03125+K02202+K03141+K03120+K10845+K03141+K03124+K10844+K10845+K03120+K03120+K03127+K03126+K03120+K03120+K10845
Sesquiterpenoid and triterpenoid biosynthesis	ko00909	35	57	6478	12921	PH02Gene18757;PH02Gene18758;PH02Gene18862;PH02Gene24471;PH02Gene26346;PH02Gene26460;PH02Gene27858;PH02Gene27859;PH02Gene28604;PH02Gene29274;PH02Gene35593;PH02Gene38812;PH02Gene38814;PH02Gene43157;PH02Gene43841;PH02Gene43850;PH02Gene48180;PH02Gene48338;PH02Gene49226;PH02Gene49482;PH02Gene49484;PH02Gene49687;PH02Gene50125;PH02Gene50978;Phyllostachys_edulis_newGene_120810;Phyllostachys_edulis_newGen…	K15803+K15803+K00511+K19011+K00801+K19011+K00801+K00801+K00801+K00511+K15793+K19011+K19011+K00801+K00511+K15891+K15803+K15803+K00511+K19011+K19011+K19011+K00801+K15803+K15803+K15803+K15891+K15803+K15793+K15797+K15891+K15891+K19011+K19011+K15793
Ascorbate and aldarate metabolism	ko00053	90	160	6478	12921	PH02Gene02028;PH02Gene02414;PH02Gene02780;PH02Gene03047;PH02Gene04079;PH02Gene04467;PH02Gene04725;PH02Gene05228;PH02Gene05313;PH02Gene05559;PH02Gene05560;PH02Gene06171;PH02Gene08122;PH02Gene08900;PH02Gene09808;PH02Gene09827;PH02Gene10186;PH02Gene10221;PH02Gene10473;PH02Gene12292;PH02Gene13431;PH02Gene14597;PH02Gene14837;PH02Gene15847;PH02Gene16121;PH02Gene16239;PH02Gene16240;PH02Gene17138;PH02Gen…	K00128+K00423+K12447+K14085+K17744+K00423+K08232+K00434+K00128+K00423+K00423+K00103+K00128+K10047+K00012+K00434+K00434+K00103+K00012+K00103+K08232+K00103+K08232+K14190+K00103+K00128+K00128+K00423+K08232+K00012+K17744+K08232+K00012+K00012+K18649+K14085+K14085+K12447+K10046+K00434+K10047+K00434+K00128+K00128+K00128+K14085+K00128+K00469+K00469+K00012+K00012+K00012+K10047+K14190+K00225+K00434+K08232+…
Biosynthesis of various secondary metabolites - part 2	ko00998	2	4	6478	12921	PH02Gene38361;PH02Gene48046	K21568+K21568
Biosynthesis of amino acids	ko01230	314	714	6478	12921	PH02Gene00019;PH02Gene00131;PH02Gene00228;PH02Gene00760;PH02Gene00875;PH02Gene01028;PH02Gene01414;PH02Gene01709;PH02Gene01934;PH02Gene01974;PH02Gene02613;PH02Gene02927;PH02Gene03238;PH02Gene03278;PH02Gene03391;PH02Gene03475;PH02Gene03563;PH02Gene03713;PH02Gene03718;PH02Gene03719;PH02Gene03820;PH02Gene04025;PH02Gene04291;PH02Gene04324;PH02Gene04463;PH02Gene04989;PH02Gene05321;PH02Gene05523;PH02Gen…	K10206+K00264+K01689+K01850+K00766+K00891+K00264+K15227+K01714+K00930+K00134+K00615+K00134+K00030+K01953+K01657+K00873+K15633+K15633+K15633+K01438+K22846+K05359+K00789+K15633+K01803+K00134+K00053+K00600+K01681+K05359+K00134+K01657+K00053+K01657+K01695+K01695+K01739+K00600+K01689+K01755+K01803+K00789+K00850+K00134+K00850+K00052+K00133+K00873+K01915+K00948+K01803+K00814+K01079+K00134+K00134+K12657+…
Circadian rhythm - plant	ko04712	54	108	6478	12921	PH02Gene01310;PH02Gene02564;PH02Gene02784;PH02Gene02878;PH02Gene03225;PH02Gene04304;PH02Gene04695;PH02Gene05360;PH02Gene07783;PH02Gene11344;PH02Gene11458;PH02Gene11884;PH02Gene13111;PH02Gene14018;PH02Gene16637;PH02Gene17031;PH02Gene21372;PH02Gene21833;PH02Gene22166;PH02Gene22372;PH02Gene24504;PH02Gene28620;PH02Gene28821;PH02Gene29623;PH02Gene30219;PH02Gene32323;PH02Gene32379;PH02Gene32451;PH02Gen…	K16221+K12133+K12121+K03115+K16223+K12126+K16223+K12133+K12121+K16223+K12130+K03097+K03115+K16223+K12129+K12130+K10143+K16223+K12125+K12130+K12127+K12121+K16221+K12124+K12125+K03115+K00660+K16223+K16223+K12126+K12119+K12119+K12130+K16223+K16223+K12124+K12126+K00660+K12116+K03115+K00660+K03115+K03115+K03115+K03115+K12125+K12130+K16223+K03115+K03115+K03115+K12126+K16221+K16221
Phosphatidylinositol signaling system	ko04070	95	167	6478	12921	PH02Gene00042;PH02Gene00067;PH02Gene00417;PH02Gene00800;PH02Gene02383;PH02Gene03460;PH02Gene05586;PH02Gene05601;PH02Gene06829;PH02Gene07142;PH02Gene07814;PH02Gene08900;PH02Gene09581;PH02Gene09851;PH02Gene09920;PH02Gene12235;PH02Gene13210;PH02Gene13802;PH02Gene13904;PH02Gene14064;PH02Gene14187;PH02Gene14589;PH02Gene15040;PH02Gene15234;PH02Gene17455;PH02Gene17636;PH02Gene17831;PH02Gene18238;PH02Gen…	K00913+K21797+K10572+K00981+K02183+K00889+K02183+K00999+K00915+K00901+K02183+K10047+K00913+K00889+K00888+K02183+K02183+K00921+K00888+K02183+K02183+K00999+K00921+K00921+K00913+K00915+K00901+K00889+K02183+K00913+K00915+K00901+K18649+K05857+K00901+K13024+K21797+K00901+K00921+K00913+K00913+K00921+K10047+K00914+K00981+K00889+K15422+K00901+K00921+K00901+K00921+K00913+K19801+K05857+K00921+K00901+K02183+…
Glyoxylate and dicarboxylate metabolism	ko00630	76	211	6478	12921	PH02Gene00753;PH02Gene01969;PH02Gene04191;PH02Gene04577;PH02Gene05779;PH02Gene05837;PH02Gene07644;PH02Gene07806;PH02Gene08937;PH02Gene09643;PH02Gene09705;PH02Gene09906;PH02Gene11705;PH02Gene12312;PH02Gene12451;PH02Gene13384;PH02Gene13681;PH02Gene14211;PH02Gene16481;PH02Gene18021;PH02Gene18183;PH02Gene18457;PH02Gene18739;PH02Gene18745;PH02Gene19660;PH02Gene20255;PH02Gene23676;PH02Gene24160;PH02Gen…	K01455+K00025+K00026+K00026+K00600+K01681+K00600+K01913+K03781+K11517+K15919+K01915+K14272+K00600+K03781+K00605+K22133+K00026+K14272+K00026+K00026+K01915+K00626+K01681+K00626+K00605+K22133+K00600+K00025+K00382+K01915+K22133+K00026+K00600+K01681+K00605+K00382+K00382+K00600+K00281+K00600+K00382+K00382+K18121+K14272+K22133+K11517+K00600+K01681+K00281+K01895+K00600+K01637+K22133+K00626+K00026+K00600+…
Selenocompound metabolism	ko00450	21	53	6478	12921	PH02Gene07377;PH02Gene09486;PH02Gene10382;PH02Gene11110;PH02Gene11311;PH02Gene11500;PH02Gene17738;PH02Gene17739;PH02Gene18052;PH02Gene21380;PH02Gene21526;PH02Gene25745;PH02Gene27487;PH02Gene36064;PH02Gene38784;PH02Gene41091;PH02Gene41603;Phyllostachys_edulis_newGene_189541;Phyllostachys_edulis_newGene_214607;Phyllostachys_edulis_newGene_335234;Phyllostachys_edulis_newGene_375546	K01739+K01874+K01761+K01874+K13811+K01874+K01739+K01739+K00549+K01761+K00549+K08247+K00384+K01874+K01739+K01874+K13811+K01874+K01739+K01874+K08247
Betalain biosynthesis	ko00965	10	13	6478	12921	PH02Gene09483;PH02Gene12605;PH02Gene15064;PH02Gene26872;PH02Gene26873;PH02Gene26874;PH02Gene31517;PH02Gene31518;PH02Gene42909;PH02Gene49813	K01593+K01593+K15777+K01593+K01593+K01593+K01593+K01593+K01593+K01593
Carbon metabolism	ko01200	344	798	6478	12921	PH02Gene00228;PH02Gene00753;PH02Gene01289;PH02Gene01726;PH02Gene01969;PH02Gene02010;PH02Gene02011;PH02Gene02613;PH02Gene02927;PH02Gene02951;PH02Gene03176;PH02Gene03238;PH02Gene03244;PH02Gene03278;PH02Gene03563;PH02Gene03713;PH02Gene03718;PH02Gene03719;PH02Gene03895;PH02Gene04191;PH02Gene04463;PH02Gene04577;PH02Gene04989;PH02Gene05321;PH02Gene05455;PH02Gene05693;PH02Gene05779;PH02Gene05837;PH02Gen…	K01689+K01455+K01810+K00627+K00025+K00261+K00261+K00134+K00615+K05605+K00161+K00134+K00036+K00030+K00873+K15633+K15633+K15633+K00074+K00026+K15633+K00026+K01803+K00134+K00121+K00627+K00600+K01681+K00121+K00134+K00844+K00051+K00162+K00600+K01100+K01689+K01913+K01803+K00850+K00029+K00134+K00850+K00029+K00051+K00162+K03781+K00627+K11517+K00161+K15919+K00873+K00948+K01803+K00814+K01079+K00134+K00036+…
Flavonoid biosynthesis	ko00941	35	69	6478	12921	PH02Gene00407;PH02Gene03419;PH02Gene05833;PH02Gene11151;PH02Gene12695;PH02Gene14718;PH02Gene17241;PH02Gene20053;PH02Gene24052;PH02Gene24448;PH02Gene24931;PH02Gene26288;PH02Gene31189;PH02Gene32095;PH02Gene32096;PH02Gene32097;PH02Gene32379;PH02Gene35698;PH02Gene35876;PH02Gene38832;PH02Gene43021;PH02Gene43237;PH02Gene44082;PH02Gene45454;PH02Gene46020;PH02Gene46022;PH02Gene46700;PH02Gene46852;PH02Gen…	K00475+K01859+K00588+K13065+K00588+K13082+K00588+K05280+K08695+K13065+K13065+K13065+K09754+K08695+K08695+K08695+K00660+K22440+K01859+K00487+K00660+K09754+K13081+K22845+K08695+K08695+K00588+K05277+K13083+K00660+K00475+K08695+K08695+K08695+K01859
Pantothenate and CoA biosynthesis	ko00770	57	123	6478	12921	PH02Gene02028;PH02Gene04864;PH02Gene05313;PH02Gene05409;PH02Gene05523;PH02Gene06250;PH02Gene06330;PH02Gene08122;PH02Gene08898;PH02Gene09562;PH02Gene10878;PH02Gene13344;PH02Gene14918;PH02Gene16239;PH02Gene16240;PH02Gene23732;PH02Gene26720;PH02Gene27245;PH02Gene28326;PH02Gene28809;PH02Gene29324;PH02Gene29326;PH02Gene29790;PH02Gene30840;PH02Gene31567;PH02Gene32423;PH02Gene32530;PH02Gene33157;PH02Gen…	K00128+K00207+K00128+K00207+K00053+K00053+K01598+K00128+K01918+K01598+K00606+K00053+K01513+K00128+K00128+K01653+K00826+K01652+K01653+K00053+K00128+K00128+K00128+K00053+K01598+K17839+K00128+K01687+K00859+K01653+K01653+K01922+K01464+K00053+K01653+K06133+K06133+K01652+K17839+K00053+K00128+K01687+K00207+K06133+K00053+K01922+K00826+K00128+K00128+K00128+K01687+K00826+K06133+K06133+K01922+K01687+K01687
Nicotinate and nicotinamide metabolism	ko00760	28	71	6478	12921	PH02Gene02442;PH02Gene10981;PH02Gene14918;PH02Gene16454;PH02Gene22842;PH02Gene24827;PH02Gene28778;PH02Gene37632;PH02Gene44042;PH02Gene44219;PH02Gene44392;PH02Gene48157;PH02Gene50111;PH02Gene51210;Phyllostachys_edulis_newGene_108926;Phyllostachys_edulis_newGene_108927;Phyllostachys_edulis_newGene_109787;Phyllostachys_edulis_newGene_160055;Phyllostachys_edulis_newGene_202442;Phyllostachys_edulis_ne…	K18551+K06210+K01513+K00763+K00763+K01950+K01240+K01240+K00763+K03787+K01240+K00763+K18551+K18551+K01950+K01950+K00763+K00858+K00858+K00858+K18551+K01950+K00763+K03787+K03787+K00278+K01240+K01240
Glucosinolate biosynthesis	ko00966	8	17	6478	12921	PH02Gene12143;PH02Gene16577;PH02Gene17477;PH02Gene24815;PH02Gene26720;PH02Gene34752;Phyllostachys_edulis_newGene_212934;Phyllostachys_edulis_newGene_335530	K12153+K12153+K12153+K12153+K00826+K01703+K00826+K00826
Ubiquinone and other terpenoid-quinone biosynthesis	ko00130	41	101	6478	12921	PH02Gene03593;PH02Gene03956;PH02Gene04832;PH02Gene06386;PH02Gene07747;PH02Gene09462;PH02Gene13863;PH02Gene14092;PH02Gene14274;PH02Gene15275;PH02Gene17189;PH02Gene20295;PH02Gene23608;PH02Gene24979;PH02Gene25547;PH02Gene26838;PH02Gene29549;PH02Gene31952;PH02Gene34632;PH02Gene35911;PH02Gene38832;PH02Gene39599;PH02Gene41377;PH02Gene42739;PH02Gene46579;Phyllostachys_edulis_newGene_135960;Phyllostachys…	K01904+K01904+K01904+K00815+K03809+K01904+K09833+K03809+K03809+K23094+K01904+K12502+K01904+K03809+K00591+K01904+K01904+K17872+K03809+K19222+K00487+K03809+K03809+K01904+K02552+K00457+K00591+K00591+K01904+K00591+K01904+K01904+K12502+K00457+K01904+K00591+K01904+K01904+K09834+K01661+K01904
Anthocyanin biosynthesis	ko00942	1	2	6478	12921	PH02Gene11177	K12930
Ribosome	ko03010	350	706	6478	12921	PH02Gene00009;PH02Gene00035;PH02Gene00107;PH02Gene00165;PH02Gene00777;PH02Gene00974;PH02Gene01356;PH02Gene01397;PH02Gene01404;PH02Gene01668;PH02Gene01767;PH02Gene02217;PH02Gene02270;PH02Gene02396;PH02Gene02409;PH02Gene02418;PH02Gene02774;PH02Gene02775;PH02Gene03148;PH02Gene03172;PH02Gene03306;PH02Gene03728;PH02Gene03780;PH02Gene04028;PH02Gene04249;PH02Gene04395;PH02Gene04424;PH02Gene04475;PH02Gen…	K02932+K02993+K02864+K02935+K02913+K02962+K02882+K02888+K02921+K02937+K02949+K02915+K02870+K02908+K02896+K02921+K02906+K02906+K02879+K02955+K02934+K02896+K02870+K02934+K02882+K02864+K02998+K02896+K02920+K02879+K02915+K02921+K02908+K02922+K02894+K02881+K02943+K02904+K02949+K02893+K02964+K02958+K02927+K02877+K02961+K02912+K02880+K02900+K02979+K02868+K02923+K02958+K02997+K02892+K02870+K02906+K02923+…
Vitamin B6 metabolism	ko00750	15	38	6478	12921	PH02Gene05331;PH02Gene06299;PH02Gene06301;PH02Gene10385;PH02Gene13385;PH02Gene14938;PH02Gene17420;PH02Gene19050;PH02Gene28568;PH02Gene34247;PH02Gene46895;PH02Gene50065;Phyllostachys_edulis_newGene_11368;Phyllostachys_edulis_newGene_163498;Phyllostachys_edulis_newGene_343651	K13248+K13248+K13248+K05275+K00275+K13248+K06215+K06215+K00831+K05275+K00831+K06215+K08681+K05275+K01733
Butanoate metabolism	ko00650	36	75	6478	12921	PH02Gene00923;PH02Gene02159;PH02Gene03895;PH02Gene07774;PH02Gene07806;PH02Gene09102;PH02Gene17091;PH02Gene17684;PH02Gene18377;PH02Gene18739;PH02Gene19660;PH02Gene21584;PH02Gene22785;PH02Gene23732;PH02Gene27245;PH02Gene28326;PH02Gene28629;PH02Gene30597;PH02Gene34179;PH02Gene34344;PH02Gene35687;PH02Gene37687;PH02Gene37915;PH02Gene39120;PH02Gene40650;PH02Gene40652;PH02Gene41554;PH02Gene45028;PH02Gen…	K01641+K01580+K00074+K01692+K01913+K17761+K01641+K01641+K01580+K00626+K00626+K01641+K01580+K01653+K01652+K01653+K00074+K01580+K01653+K01653+K18121+K01641+K00109+K01653+K16871+K17761+K01640+K01652+K00626+K16871+K00109+K01580+K17761+K17761+K18121+K01640
Protein export	ko03060	77	159	6478	12921	PH02Gene00289;PH02Gene01838;PH02Gene02155;PH02Gene02847;PH02Gene04458;PH02Gene05017;PH02Gene05279;PH02Gene05673;PH02Gene07300;PH02Gene07919;PH02Gene08078;PH02Gene08419;PH02Gene09924;PH02Gene09925;PH02Gene12077;PH02Gene13149;PH02Gene13445;PH02Gene13910;PH02Gene15238;PH02Gene15630;PH02Gene17784;PH02Gene18735;PH02Gene21434;PH02Gene23247;PH02Gene25095;PH02Gene25586;PH02Gene25867;PH02Gene26012;PH02Gen…	K09490+K03104+K12947+K09490+K10956+K03217+K03109+K07342+K03109+K03108+K03070+K03070+K09490+K09490+K03108+K09540+K03070+K09490+K09648+K13280+K03100+K03105+K03070+K12946+K09490+K12946+K12946+K09490+K03217+K12275+K03107+K10956+K09540+K12948+K03106+K09648+K09648+K09648+K12946+K09490+K09490+K09490+K09481+K12946+K09490+K10956+K13431+K03217+K09647+K03106+K12946+K03104+K09490+K09490+K09490+K03070+K03070+…
Sulfur relay system	ko04122	18	35	6478	12921	PH02Gene01189;PH02Gene09137;PH02Gene10779;PH02Gene14336;PH02Gene15834;PH02Gene17258;PH02Gene30785;PH02Gene33757;PH02Gene40577;PH02Gene45971;Phyllostachys_edulis_newGene_291172;Phyllostachys_edulis_newGene_319904;Phyllostachys_edulis_newGene_340016;Phyllostachys_edulis_newGene_354195;Phyllostachys_edulis_newGene_48440;Phyllostachys_edulis_newGene_65010;Phyllostachys_edulis_newGene_79047;Phyllostac…	K14169+K01011+K14168+K03635+K14169+K11996+K04487+K21232+K03639+K12161+K14168+K11996+K03639+K01011+K14168+K01011+K14168+K01011
Non-homologous end-joining	ko03450	14	30	6478	12921	PH02Gene08901;PH02Gene12512;PH02Gene23703;PH02Gene34716;PH02Gene41506;PH02Gene48082;Phyllostachys_edulis_newGene_242583;Phyllostachys_edulis_newGene_242584;Phyllostachys_edulis_newGene_299967;Phyllostachys_edulis_newGene_312660;Phyllostachys_edulis_newGene_372095;Phyllostachys_edulis_newGene_58163;Phyllostachys_edulis_newGene_83353;Phyllostachys_edulis_newGene_92864	K10884+K10886+K10884+K03512+K03512+K03512+K10865+K10865+K10865+K04799+K03512+K10865+K10865+K10866
Phagosome	ko04145	82	184	6478	12921	PH02Gene02086;PH02Gene02433;PH02Gene04458;PH02Gene04941;PH02Gene05673;PH02Gene06008;PH02Gene07972;PH02Gene08671;PH02Gene09134;PH02Gene11979;PH02Gene12426;PH02Gene12895;PH02Gene12921;PH02Gene13286;PH02Gene13465;PH02Gene13692;PH02Gene13802;PH02Gene14370;PH02Gene14735;PH02Gene15040;PH02Gene15077;PH02Gene15234;PH02Gene15693;PH02Gene17140;PH02Gene17297;PH02Gene17435;PH02Gene17726;PH02Gene18029;PH02Gen…	K08492+K02150+K10956+K02154+K07342+K08057+K04392+K02144+K07375+K02146+K08057+K07897+K02150+K08057+K07375+K02149+K00921+K02149+K07897+K00921+K07897+K00921+K08517+K02147+K07375+K07375+K02155+K07889+K02150+K07897+K04392+K07889+K07375+K02145+K00921+K02155+K00921+K04392+K00914+K07375+K08057+K07375+K10956+K02155+K00921+K00921+K02145+K07375+K09481+K02155+K00921+K03661+K08057+K07374+K10956+K02150+K00921+…
Arginine and proline metabolism	ko00330	80	168	6478	12921	PH02Gene00820;PH02Gene02028;PH02Gene03047;PH02Gene03994;PH02Gene04289;PH02Gene05076;PH02Gene05313;PH02Gene05568;PH02Gene06665;PH02Gene08122;PH02Gene11414;PH02Gene12065;PH02Gene13026;PH02Gene14479;PH02Gene14979;PH02Gene15338;PH02Gene16239;PH02Gene16240;PH02Gene16969;PH02Gene17054;PH02Gene21464;PH02Gene21945;PH02Gene22051;PH02Gene22988;PH02Gene24183;PH02Gene24443;PH02Gene26388;PH02Gene26443;PH02Gen…	K00318+K00128+K14085+K10536+K01611+K01581+K00128+K00472+K01611+K00128+K12657+K00318+K01583+K01583+K01259+K01259+K00128+K00128+K12259+K01426+K00294+K00472+K00318+K14085+K14085+K01611+K01583+K12251+K00472+K01583+K01259+K00472+K00128+K00128+K00128+K14085+K12657+K01611+K17839+K00128+K12657+K01426+K01426+K01426+K00819+K14455+K01611+K00472+K13427+K12657+K00286+K01581+K01426+K01426+K01426+K01581+K17839+…
MAPK signaling pathway - plant	ko04016	209	360	6478	12921	PH02Gene00101;PH02Gene00210;PH02Gene00515;PH02Gene00603;PH02Gene01056;PH02Gene01194;PH02Gene01803;PH02Gene01939;PH02Gene01947;PH02Gene02309;PH02Gene02383;PH02Gene02558;PH02Gene02880;PH02Gene02887;PH02Gene03004;PH02Gene03062;PH02Gene03512;PH02Gene03652;PH02Gene04344;PH02Gene05053;PH02Gene05365;PH02Gene05586;PH02Gene06317;PH02Gene06554;PH02Gene07814;PH02Gene08937;PH02Gene09106;PH02Gene09319;PH02Gen…	K20536+K14497+K20717+K20772+K13413+K14498+K13420+K20772+K20772+K14498+K02183+K20600+K14498+K00940+K20547+K13447+K14497+K14496+K20547+K14497+K20600+K02183+K14496+K20716+K02183+K03781+K17686+K20714+K13413+K20604+K20604+K13414+K13422+K02183+K03781+K20606+K20726+K14497+K02183+K20714+K02183+K14497+K02183+K20718+K14497+K13447+K14497+K14498+K20714+K14509+K14514+K20547+K14496+K20726+K14496+K14514+K14509+…
Cysteine and methionine metabolism	ko00270	149	339	6478	12921	PH02Gene00603;PH02Gene01123;PH02Gene01939;PH02Gene01947;PH02Gene01969;PH02Gene02494;PH02Gene02610;PH02Gene02972;PH02Gene04025;PH02Gene04191;PH02Gene04289;PH02Gene04324;PH02Gene04577;PH02Gene05511;PH02Gene05691;PH02Gene06386;PH02Gene06665;PH02Gene06684;PH02Gene06745;PH02Gene07377;PH02Gene07645;PH02Gene08020;PH02Gene09137;PH02Gene09787;PH02Gene10382;PH02Gene11750;PH02Gene11842;PH02Gene12071;PH02Gen…	K20772+K00547+K20772+K20772+K00025+K05933+K01919+K01251+K22846+K00026+K01611+K00789+K00026+K00827+K00016+K00815+K01611+K05933+K00558+K01739+K01251+K00789+K01011+K00133+K01761+K00547+K00558+K00928+K16054+K00026+K01762+K00133+K00058+K08967+K08967+K08967+K01738+K05933+K01739+K01739+K16054+K00026+K01738+K00549+K00026+K01738+K01251+K05933+K00133+K23977+K08967+K00016+K01761+K00549+K01738+K12524+K05933+…
Tropane, piperidine and pyridine alkaloid biosynthesis	ko00960	21	50	6478	12921	PH02Gene00209;PH02Gene03291;PH02Gene04032;PH02Gene06386;PH02Gene14227;PH02Gene15015;PH02Gene16770;PH02Gene23793;PH02Gene26282;PH02Gene32343;PH02Gene35465;PH02Gene41987;PH02Gene42016;PH02Gene42017;PH02Gene42018;PH02Gene45500;PH02Gene47200;Phyllostachys_edulis_newGene_140469;Phyllostachys_edulis_newGene_25455;Phyllostachys_edulis_newGene_289964;Phyllostachys_edulis_newGene_333269	K08081+K00276+K00276+K00815+K08081+K15849+K00817+K08081+K00276+K15849+K14455+K15849+K08081+K08081+K08081+K08081+K08081+K14455+K08081+K00817+K14455
Arachidonic acid metabolism	ko00590	13	33	6478	12921	PH02Gene02204;PH02Gene13921;PH02Gene14893;PH02Gene17816;PH02Gene18378;PH02Gene20340;PH02Gene28076;PH02Gene31441;PH02Gene39104;PH02Gene46571;PH02Gene47320;PH02Gene47321;Phyllostachys_edulis_newGene_158432	K18592+K01047+K05309+K00079+K18592+K00432+K00079+K14674+K00432+K18592+K18592+K18592+K00432
Biotin metabolism	ko00780	33	66	6478	12921	PH02Gene01150;PH02Gene02287;PH02Gene03760;PH02Gene09578;PH02Gene10596;PH02Gene25940;PH02Gene32268;PH02Gene33839;PH02Gene36438;PH02Gene36508;PH02Gene36509;PH02Gene37810;PH02Gene38127;PH02Gene42627;PH02Gene47982;PH02Gene48114;PH02Gene50333;PH02Gene50449;Phyllostachys_edulis_newGene_131332;Phyllostachys_edulis_newGene_139731;Phyllostachys_edulis_newGene_139732;Phyllostachys_edulis_newGene_144075;Phy…	K00059+K09458+K00059+K09458+K09458+K00059+K00208+K00059+K00059+K00059+K00059+K00059+K01942+K01942+K01942+K01942+K02372+K02372+K01942+K09458+K09458+K01942+K01942+K01942+K01942+K00059+K00059+K00059+K09458+K01942+K00652+K01942+K09458
Riboflavin metabolism	ko00740	15	50	6478	12921	PH02Gene00802;PH02Gene06379;PH02Gene13058;PH02Gene14918;PH02Gene18527;PH02Gene19125;PH02Gene19476;PH02Gene22874;PH02Gene27659;PH02Gene29936;PH02Gene31473;PH02Gene44373;Phyllostachys_edulis_newGene_278643;Phyllostachys_edulis_newGene_370472;Phyllostachys_edulis_newGene_370473	K20884+K14379+K14652+K01513+K00793+K14379+K11752+K00953+K22949+K14652+K14379+K14379+K20884+K14652+K14652
Biosynthesis of unsaturated fatty acids	ko01040	37	67	6478	12921	PH02Gene04523;PH02Gene05757;PH02Gene05899;PH02Gene07862;PH02Gene12258;PH02Gene12259;PH02Gene12260;PH02Gene12261;PH02Gene13998;PH02Gene18274;PH02Gene18354;PH02Gene19500;PH02Gene20796;PH02Gene20843;PH02Gene24080;PH02Gene24580;PH02Gene27283;PH02Gene28020;PH02Gene28281;PH02Gene28456;PH02Gene31154;PH02Gene31156;PH02Gene31584;PH02Gene31588;PH02Gene40771;PH02Gene41206;PH02Gene41208;PH02Gene44807;PH02Gen…	K10251+K03921+K07513+K03921+K03921+K03921+K03921+K03921+K10251+K07513+K10251+K03921+K01068+K00232+K03921+K00232+K00232+K10251+K00232+K10703+K10251+K10251+K03921+K03921+K03921+K03921+K03921+K07513+K00232+K03921+K10251+K00232+K10251+K00232+K10703+K00232+K00232
Fatty acid degradation	ko00071	81	137	6478	12921	PH02Gene02028;PH02Gene03047;PH02Gene04338;PH02Gene05313;PH02Gene05455;PH02Gene05879;PH02Gene05899;PH02Gene07710;PH02Gene07774;PH02Gene08122;PH02Gene08365;PH02Gene11239;PH02Gene15276;PH02Gene16239;PH02Gene16240;PH02Gene18233;PH02Gene18274;PH02Gene18739;PH02Gene19660;PH02Gene19712;PH02Gene20843;PH02Gene22988;PH02Gene24183;PH02Gene24580;PH02Gene24861;PH02Gene24862;PH02Gene24863;PH02Gene25211;PH02Gen…	K00128+K14085+K01897+K00128+K00121+K00121+K07513+K15401+K01692+K00128+K01897+K10527+K00121+K00128+K00128+K00121+K07513+K00626+K00626+K01897+K00232+K14085+K14085+K00232+K07517+K07517+K07517+K01897+K10527+K00232+K00232+K10527+K00128+K00128+K01897+K00128+K14085+K00128+K00001+K18857+K18857+K10527+K01897+K20495+K01897+K00249+K18857+K10527+K07513+K00232+K00128+K01897+K00232+K00626+K07517+K00121+K10527+…
Lysine biosynthesis	ko00300	25	47	6478	12921	PH02Gene00019;PH02Gene01934;PH02Gene09787;PH02Gene11773;PH02Gene12071;PH02Gene12344;PH02Gene14144;PH02Gene15793;PH02Gene18885;PH02Gene21626;PH02Gene21784;PH02Gene32458;PH02Gene34142;PH02Gene37345;PH02Gene39970;PH02Gene44178;Phyllostachys_edulis_newGene_107901;Phyllostachys_edulis_newGene_146360;Phyllostachys_edulis_newGene_170918;Phyllostachys_edulis_newGene_19912;Phyllostachys_edulis_newGene_295…	K10206+K01714+K00133+K01778+K00928+K01778+K00215+K00133+K00133+K12524+K01714+K01778+K12524+K10206+K10206+K10206+K01714+K01778+K01778+K00133+K00133+K00133+K00928+K01778+K01778
Endocytosis	ko04144	214	441	6478	12921	PH02Gene00162;PH02Gene00168;PH02Gene00403;PH02Gene00728;PH02Gene00921;PH02Gene02105;PH02Gene02265;PH02Gene02444;PH02Gene03082;PH02Gene03088;PH02Gene03142;PH02Gene03234;PH02Gene03460;PH02Gene03741;PH02Gene03742;PH02Gene04492;PH02Gene04546;PH02Gene04870;PH02Gene04981;PH02Gene05078;PH02Gene05534;PH02Gene05843;PH02Gene06078;PH02Gene06622;PH02Gene07108;PH02Gene07416;PH02Gene07656;PH02Gene07992;PH02Gen…	K03283+K03283+K12492+K07937+K01115+K12483+K12471+K07904+K19476+K03283+K07901+K12492+K00889+K12190+K07937+K12190+K07937+K01528+K03283+K01115+K12194+K12471+K03283+K12492+K07904+K12198+K12189+K07904+K12198+K01115+K07904+K05755+K10365+K07904+K12493+K10364+K12483+K12492+K00889+K12471+K12486+K01115+K12197+K07897+K11866+K18465+K01115+K12194+K07937+K07897+K12200+K07897+K12486+K12191+K12185+K07904+K12492+…
Glycerophospholipid metabolism	ko00564	154	272	6478	12921	PH02Gene00800;PH02Gene00921;PH02Gene01454;PH02Gene01495;PH02Gene02359;PH02Gene02621;PH02Gene02838;PH02Gene03435;PH02Gene03447;PH02Gene05039;PH02Gene05078;PH02Gene05601;PH02Gene05631;PH02Gene05664;PH02Gene07142;PH02Gene07405;PH02Gene07711;PH02Gene08338;PH02Gene10074;PH02Gene10134;PH02Gene10648;PH02Gene11809;PH02Gene12369;PH02Gene13921;PH02Gene13930;PH02Gene14589;PH02Gene16545;PH02Gene16552;PH02Gen…	K00981+K01115+K05929+K13519+K00006+K00993+K13510+K00967+K05929+K14156+K01115+K00999+K00993+K13508+K00901+K13508+K13508+K01115+K00006+K13508+K01115+K01114+K13508+K01047+K01115+K00999+K01126+K01114+K00967+K13508+K00967+K00901+K13508+K08730+K05929+K00901+K01126+K00006+K06130+K01115+K01114+K05929+K01115+K00967+K22389+K00967+K18693+K00901+K15728+K01126+K14156+K00901+K13510+K01115+K01115+K01115+K14156+…
Alanine, aspartate and glutamate metabolism	ko00250	84	166	6478	12921	PH02Gene00131;PH02Gene00467;PH02Gene01414;PH02Gene02010;PH02Gene02011;PH02Gene02159;PH02Gene02614;PH02Gene03391;PH02Gene05511;PH02Gene07763;PH02Gene07802;PH02Gene07852;PH02Gene09102;PH02Gene09906;PH02Gene10606;PH02Gene11705;PH02Gene16047;PH02Gene16224;PH02Gene16481;PH02Gene18333;PH02Gene18377;PH02Gene18407;PH02Gene18457;PH02Gene19614;PH02Gene19691;PH02Gene21347;PH02Gene21464;PH02Gene22023;PH02Gen…	K00264+K13051+K00264+K00261+K00261+K01580+K13566+K01953+K00827+K01756+K01755+K00764+K17761+K01915+K00814+K14272+K01755+K01956+K14272+K01956+K01580+K00264+K01915+K00764+K01756+K00764+K00294+K01956+K01580+K00827+K01939+K01953+K00764+K00827+K01915+K00261+K01939+K00609+K01956+K01580+K00764+K00764+K13051+K13051+K00827+K14455+K00264+K14272+K00261+K00820+K13566+K00820+K00820+K16871+K17761+K00820+K00814+…
Plant-pathogen interaction	ko04626	315	566	6478	12921	PH02Gene00101;PH02Gene00483;PH02Gene00500;PH02Gene00632;PH02Gene00646;PH02Gene00859;PH02Gene01056;PH02Gene01138;PH02Gene01803;PH02Gene02327;PH02Gene02383;PH02Gene02558;PH02Gene02868;PH02Gene03062;PH02Gene03215;PH02Gene03898;PH02Gene04016;PH02Gene04135;PH02Gene04136;PH02Gene04173;PH02Gene04518;PH02Gene04838;PH02Gene04929;PH02Gene05292;PH02Gene05293;PH02Gene05365;PH02Gene05497;PH02Gene05586;PH02Gen…	K20536+K00864+K05391+K13412+K15397+K13412+K13413+K13448+K13420+K13412+K02183+K20600+K13412+K13447+K13436+K15397+K18835+K13448+K13448+K13448+K13412+K15397+K13412+K15397+K13448+K20600+K15397+K02183+K13412+K13412+K15397+K09487+K13412+K13412+K02358+K13412+K15397+K13412+K13456+K13429+K13436+K15397+K02183+K15397+K13456+K15397+K15397+K13412+K15397+K13448+K13413+K13448+K13412+K13434+K13448+K13412+K13414+…
mRNA surveillance pathway	ko03015	162	351	6478	12921	PH02Gene00155;PH02Gene00279;PH02Gene00655;PH02Gene00746;PH02Gene01690;PH02Gene01867;PH02Gene02051;PH02Gene02241;PH02Gene02306;PH02Gene02882;PH02Gene03092;PH02Gene03507;PH02Gene03519;PH02Gene03572;PH02Gene04064;PH02Gene04298;PH02Gene04489;PH02Gene04755;PH02Gene05318;PH02Gene06504;PH02Gene06626;PH02Gene06826;PH02Gene06827;PH02Gene07198;PH02Gene07764;PH02Gene08357;PH02Gene08856;PH02Gene10745;PH02Gen…	K13126+K14397+K14376+K14411+K12876+K12812+K14407+K12812+K14376+K14396+K14376+K06269+K13171+K18655+K11584+K12876+K14404+K11583+K14376+K14396+K13126+K14325+K14325+K13126+K14376+K11584+K11584+K14396+K13171+K11584+K13126+K06269+K03265+K14411+K13126+K13025+K13098+K03265+K13917+K11584+K04382+K11584+K06965+K04354+K03456+K12881+K14411+K14411+K18655+K06269+K14406+K06269+K14376+K04382+K13126+K04354+K14962+…
RNA polymerase	ko03020	47	114	6478	12921	PH02Gene03231;PH02Gene03313;PH02Gene08157;PH02Gene11369;PH02Gene11370;PH02Gene14396;PH02Gene15004;PH02Gene16080;PH02Gene16429;PH02Gene16731;PH02Gene24602;PH02Gene27445;PH02Gene27491;PH02Gene27866;PH02Gene32480;PH02Gene36534;PH02Gene39625;PH02Gene43094;PH02Gene43945;PH02Gene44019;PH02Gene45979;PH02Gene46024;PH02Gene46025;PH02Gene46026;PH02Gene46259;PH02Gene46870;PH02Gene47355;PH02Gene49428;PH02Gen…	K03013+K03019+K03012+K03018+K03018+K03011+K03014+K03026+K03012+K03017+K03005+K03014+K03018+K03008+K03024+K02999+K03026+K03005+K03013+K03005+K03014+K03006+K03006+K03006+K02999+K03006+K03014+K03018+K03018+K03016+K03018+K02999+K02999+K03020+K03027+K03006+K03021+K02999+K03002+K02999+K03016+K03006+K03006+K03005+K03018+K03006+K03006
Phenylalanine metabolism	ko00360	42	92	6478	12921	PH02Gene02767;PH02Gene03291;PH02Gene03895;PH02Gene04032;PH02Gene06386;PH02Gene07774;PH02Gene09483;PH02Gene12605;PH02Gene15015;PH02Gene16770;PH02Gene17054;PH02Gene26282;PH02Gene26872;PH02Gene26873;PH02Gene26874;PH02Gene27014;PH02Gene27016;PH02Gene28629;PH02Gene30511;PH02Gene31517;PH02Gene31518;PH02Gene32343;PH02Gene33085;PH02Gene33088;PH02Gene33094;PH02Gene35465;PH02Gene41987;PH02Gene42283;PH02Gen…	K07253+K00276+K00074+K00276+K00815+K01692+K01593+K01593+K15849+K00817+K01426+K00276+K01593+K01593+K01593+K10775+K13064+K00074+K10775+K01593+K01593+K15849+K01426+K01426+K01426+K14455+K15849+K01426+K01426+K01426+K01593+K01426+K01426+K01426+K07253+K01593+K01426+K00457+K14455+K00457+K00817+K14455
miRNA host gene
KEGG Pathway	ko ID	DEgene	gene	Degene (all)	gene (all)	Gene ID	KOs
Spliceosome	ko03040	29	520	783	12921	PH02Gene10754;PH02Gene11166;PH02Gene12494;PH02Gene12713;PH02Gene16189;PH02Gene16194;PH02Gene17257;PH02Gene18202;PH02Gene22491;PH02Gene26164;PH02Gene29791;PH02Gene39061;PH02Gene41005;PH02Gene41324;PH02Gene41783;PH02Gene42153;PH02Gene42155;PH02Gene42178;PH02Gene45580;PH02Gene45804;PH02Gene45808;PH02Gene45972;PH02Gene48260;PH02Gene50928;Phyllostachys_edulis_newGene_117884;Phyllostachys_edulis_newGen…	K06063+K12896+K12741+K12872+K12823+K12812+K12872+K12875+K12857+K12891+K12821+K12830+K03283+K03283+K06063+K12741+K12825+K12857+K12741+K12823+K12812+K03283+K12865+K12890+K03283+K12880+K12869+K12817+K12817
Carotenoid biosynthesis	ko00906	6	82	783	12921	PH02Gene01950;PH02Gene08431;PH02Gene19716;PH02Gene29430;PH02Gene30782;PH02Gene48655	K15746+K15744+K02291+K02291+K02291+K02291
Arginine and proline metabolism	ko00330	10	168	783	12921	PH02Gene05076;PH02Gene21464;PH02Gene26387;PH02Gene26388;PH02Gene26390;PH02Gene26391;PH02Gene28221;PH02Gene28337;PH02Gene30308;PH02Gene30348	K01581+K00294+K01583+K01583+K01583+K01583+K01583+K01611+K01611+K14085
Homologous recombination	ko03440	24	359	783	12921	PH02Gene19330;PH02Gene19819;PH02Gene24380;PH02Gene29871;PH02Gene30436;PH02Gene32448;PH02Gene34057;PH02Gene44016;PH02Gene47669;Phyllostachys_edulis_newGene_14937;Phyllostachys_edulis_newGene_161856;Phyllostachys_edulis_newGene_182401;Phyllostachys_edulis_newGene_18711;Phyllostachys_edulis_newGene_199418;Phyllostachys_edulis_newGene_210855;Phyllostachys_edulis_newGene_210856;Phyllostachys_edulis_ne…	K03553+K07466+K03553+K07466+K10867+K03504+K10728+K04482+K03504+K10683+K07466+K10875+K10901+K07466+K07466+K07466+K10683+K04728+K02335+K04728+K07466+K07466+K07466+K07466
Sesquiterpenoid and triterpenoid biosynthesis	ko00909	8	57	783	12921	PH02Gene15780;PH02Gene27859;PH02Gene42720;PH02Gene43157;PH02Gene48328;PH02Gene49226;PH02Gene49482;Phyllostachys_edulis_newGene_192586	K00801+K00801+K00801+K00801+K19011+K00511+K19011+K15803
Cysteine and methionine metabolism	ko00270	15	339	783	12921	PH02Gene01123;PH02Gene04358;PH02Gene06303;PH02Gene06386;PH02Gene11649;PH02Gene12433;PH02Gene16950;PH02Gene18885;PH02Gene28337;PH02Gene30308;PH02Gene45828;Phyllostachys_edulis_newGene_181300;Phyllostachys_edulis_newGene_22189;Phyllostachys_edulis_newGene_287381;Phyllostachys_edulis_newGene_95192	K00547+K01919+K01762+K00815+K01760+K01762+K08967+K00133+K01611+K01611+K01760+K00837+K01011+K01738+K01011
Selenocompound metabolism	ko00450	5	53	783	12921	PH02Gene11311;PH02Gene11649;PH02Gene25745;PH02Gene45828;Phyllostachys_edulis_newGene_400584	K13811+K01760+K08247+K01760+K01874
Lysine biosynthesis	ko00300	1	47	783	12921	PH02Gene18885	K00133
Plant hormone signal transduction	ko04075	24	598	783	12921	PH02Gene00395;PH02Gene02673;PH02Gene05898;PH02Gene08019;PH02Gene09510;PH02Gene11532;PH02Gene13739;PH02Gene17808;PH02Gene18129;PH02Gene18336;PH02Gene19390;PH02Gene21053;PH02Gene24567;PH02Gene30103;PH02Gene33463;PH02Gene33717;PH02Gene36939;PH02Gene38868;PH02Gene41993;PH02Gene42667;PH02Gene50651;Phyllostachys_edulis_newGene_149688;Phyllostachys_edulis_newGene_178413;Phyllostachys_edulis_newGene_76869	K14486+K13413+K14484+K14490+K13464+K14504+K16189+K14487+K14514+K14491+K14508+K14492+K14497+K14485+K14497+K14513+K14484+K14485+K14498+K14492+K14484+K14491+K14489+K14491
Biosynthesis of amino acids	ko01230	28	714	783	12921	PH02Gene01414;PH02Gene02303;PH02Gene07041;PH02Gene08600;PH02Gene11649;PH02Gene15222;PH02Gene16013;PH02Gene18885;PH02Gene28692;PH02Gene28763;PH02Gene35032;PH02Gene36458;PH02Gene36929;PH02Gene38142;PH02Gene38878;PH02Gene40731;PH02Gene42116;PH02Gene45828;PH02Gene46818;PH02Gene51251;Phyllostachys_edulis_newGene_129684;Phyllostachys_edulis_newGene_211359;Phyllostachys_edulis_newGene_231242;Phyllostach…	K00264+K00927+K14677+K00891+K01760+K00013+K00873+K00133+K01681+K01803+K01783+K00264+K00850+K01783+K01681+K01626+K00030+K01760+K14272+K01783+K00930+K01783+K00873+K01783+K01738+K01783+K01658+K15227
Pentose and glucuronate interconversions	ko00040	13	156	783	12921	PH02Gene05641;PH02Gene21788;PH02Gene35032;PH02Gene38142;PH02Gene40799;PH02Gene42889;PH02Gene51251;Phyllostachys_edulis_newGene_176807;Phyllostachys_edulis_newGene_211359;Phyllostachys_edulis_newGene_24625;Phyllostachys_edulis_newGene_310941;Phyllostachys_edulis_newGene_50884;Phyllostachys_edulis_newGene_8870	K00963+K01805+K01783+K01783+K01051+K01213+K01783+K01051+K01783+K01783+K01783+K01184+K01184
ABC transporters	ko02010	10	106	783	12921	PH02Gene02694;PH02Gene03263;PH02Gene06566;PH02Gene06567;PH02Gene15335;PH02Gene18770;PH02Gene24658;PH02Gene34686;Phyllostachys_edulis_newGene_211574;Phyllostachys_edulis_newGene_386603	K05674+K05658+K05658+K05658+K05658+K05658+K05658+K05658+K05658+K05658
Ribosome biogenesis in eukaryotes	ko03008	9	281	783	12921	PH02Gene08006;PH02Gene13161;PH02Gene18279;PH02Gene35972;PH02Gene46841;PH02Gene48486;Phyllostachys_edulis_newGene_117122;Phyllostachys_edulis_newGene_148782;Phyllostachys_edulis_newGene_54941	K14558+K13288+K14572+K14544+K14544+K14548+K14554+K14554+K14544
Ribosome	ko03010	26	706	783	12921	PH02Gene00035;PH02Gene00777;PH02Gene03172;PH02Gene04222;PH02Gene04943;PH02Gene05370;PH02Gene12871;PH02Gene25305;PH02Gene25619;PH02Gene25621;PH02Gene30082;PH02Gene34594;PH02Gene36620;PH02Gene40942;PH02Gene45030;PH02Gene49701;PH02Gene50058;PH02Gene50537;PH02Gene50858;Phyllostachys_edulis_newGene_105465;Phyllostachys_edulis_newGene_170925;Phyllostachys_edulis_newGene_204416;Phyllostachys_edulis_newG…	K02993+K02913+K02955+K02935+K02973+K02915+K02903+K02883+K02893+K02893+K02883+K02931+K02945+K02866+K02875+K02966+K02937+K02955+K02883+K02886+K02956+K02946+K02886+K02922+K02983+K02914
Carbon fixation in photosynthetic organisms	ko00710	21	211	783	12921	PH02Gene00801;PH02Gene02276;PH02Gene02303;PH02Gene03788;PH02Gene17585;PH02Gene19663;PH02Gene20137;PH02Gene20510;PH02Gene24076;PH02Gene28763;PH02Gene35032;PH02Gene38142;PH02Gene38194;PH02Gene42339;PH02Gene46818;PH02Gene51251;Phyllostachys_edulis_newGene_211359;Phyllostachys_edulis_newGene_24625;Phyllostachys_edulis_newGene_310941;Phyllostachys_edulis_newGene_5244;Phyllostachys_edulis_newGene_77742	K01595+K00855+K00927+K00855+K01595+K01595+K03841+K05298+K03841+K01803+K01783+K01783+K03841+K00029+K14272+K01783+K01783+K01783+K01783+K01601+K00029
Glycosylphosphatidylinositol (GPI)-anchor biosynthesis	ko00563	2	59	783	12921	PH02Gene01159;Phyllostachys_edulis_newGene_386167	K07541+K05283
Carbon metabolism	ko01200	49	798	783	12921	PH02Gene00801;PH02Gene02276;PH02Gene02303;PH02Gene03788;PH02Gene09705;PH02Gene10597;PH02Gene15245;PH02Gene16013;PH02Gene16078;PH02Gene17585;PH02Gene19622;PH02Gene19663;PH02Gene20137;PH02Gene20510;PH02Gene24076;PH02Gene24831;PH02Gene27519;PH02Gene28281;PH02Gene28692;PH02Gene28763;PH02Gene29147;PH02Gene31351;PH02Gene35032;PH02Gene36929;PH02Gene38142;PH02Gene38194;PH02Gene38530;PH02Gene38878;PH02Gen…	K01595+K00855+K00927+K00855+K15919+K11517+K00627+K00873+K00658+K01595+K00162+K01595+K03841+K05298+K03841+K00844+K00033+K00232+K01681+K01803+K00036+K15893+K01783+K00850+K01783+K03841+K11517+K01681+K00658+K00232+K00030+K00029+K00382+K00844+K14272+K01783+K01783+K23146+K00873+K00627+K01783+K00627+K01738+K01783+K00033+K00605+K01601+K00382+K00029
Cyanoamino acid metabolism	ko00460	7	133	783	12921	PH02Gene04611;PH02Gene08382;PH02Gene15584;PH02Gene19810;PH02Gene19972;PH02Gene38601;Phyllostachys_edulis_newGene_48802	K01188+K13029+K08249+K01188+K05349+K05349+K01188
Protein processing in endoplasmic reticulum	ko04141	39	564	783	12921	PH02Gene03060;PH02Gene03498;PH02Gene05232;PH02Gene11926;PH02Gene12131;PH02Gene12201;PH02Gene12549;PH02Gene13145;PH02Gene13149;PH02Gene13665;PH02Gene14404;PH02Gene16014;PH02Gene18093;PH02Gene20721;PH02Gene21535;PH02Gene21836;PH02Gene22829;PH02Gene25094;PH02Gene25315;PH02Gene31128;PH02Gene31961;PH02Gene32131;PH02Gene36126;PH02Gene38226;PH02Gene38594;PH02Gene38708;PH02Gene41005;PH02Gene41324;PH02Gen…	K08288+K13993+K09580+K08288+K09540+K08288+K10950+K09540+K09540+K10661+K07953+K08288+K09487+K09580+K09487+K14004+K09486+K14005+K09517+K09490+K03094+K14007+K14004+K14005+K11863+K10956+K03283+K03283+K14007+K09561+K03283+K09540+K12666+K08288+K05546+K13993+K03283+K09487+K01456
Linoleic acid metabolism	ko00591	3	29	783	12921	PH02Gene18249;PH02Gene29184;PH02Gene31441	K15718+K14674+K14674
Fatty acid degradation	ko00071	4	137	783	12921	PH02Gene28281;PH02Gene30348;PH02Gene39954;PH02Gene40931	K00232+K14085+K01897+K00232
Proteasome	ko03050	15	226	783	12921	PH02Gene04327;PH02Gene04673;PH02Gene05018;PH02Gene05813;PH02Gene06947;PH02Gene08393;PH02Gene08675;PH02Gene08890;PH02Gene16702;PH02Gene16945;PH02Gene41459;Phyllostachys_edulis_newGene_145581;Phyllostachys_edulis_newGene_198821;Phyllostachys_edulis_newGene_242135;Phyllostachys_edulis_newGene_319048	K02726+K02726+K03029+K11599+K06700+K03035+K06700+K03035+K02726+K02726+K02726+K03033+K06700+K02737+K02738
One carbon pool by folate	ko00670	2	66	783	12921	Phyllostachys_edulis_newGene_188776;Phyllostachys_edulis_newGene_40570	K00601+K00605
Aminoacyl-tRNA biosynthesis	ko00970	11	199	783	12921	PH02Gene06271;PH02Gene24878;PH02Gene27688;PH02Gene29247;PH02Gene30257;PH02Gene42214;PH02Gene44356;Phyllostachys_edulis_newGene_343271;Phyllostachys_edulis_newGene_343272;Phyllostachys_edulis_newGene_368473;Phyllostachys_edulis_newGene_400584	K01886+K01886+K01889+K01887+K01872+K01881+K01876+K01869+K01869+K01887+K01874
Stilbenoid, diarylheptanoid and gingerol biosynthesis	ko00945	2	26	783	12921	PH02Gene06655;PH02Gene24448	K13065+K13065
Tryptophan metabolism	ko00380	6	153	783	12921	PH02Gene16078;PH02Gene30348;PH02Gene38902;PH02Gene45883;Phyllostachys_edulis_newGene_181300;Phyllostachys_edulis_newGene_57849	K00658+K14085+K00658+K00382+K00837+K00382
Ubiquitin mediated proteolysis	ko04120	32	331	783	12921	PH02Gene00505;PH02Gene00892;PH02Gene01398;PH02Gene01399;PH02Gene01685;PH02Gene03774;PH02Gene08773;PH02Gene18043;PH02Gene18394;PH02Gene20623;PH02Gene22421;PH02Gene26421;PH02Gene31349;PH02Gene31961;PH02Gene32855;PH02Gene33687;PH02Gene34103;PH02Gene39653;PH02Gene42072;PH02Gene43585;PH02Gene44759;PH02Gene48312;Phyllostachys_edulis_newGene_102659;Phyllostachys_edulis_newGene_170120;Phyllostachys_eduli…	K03869+K03364+K10581+K10581+K10571+K03363+K03363+K03352+K10581+K03352+K10581+K10581+K10590+K03094+K10688+K08770+K10583+K10581+K03352+K09561+K10589+K03869+K10590+K10588+K10581+K10590+K10588+K03352+K10581+K03364+K03353+K03364
Sulfur metabolism	ko00920	4	127	783	12921	PH02Gene11311;Phyllostachys_edulis_newGene_22189;Phyllostachys_edulis_newGene_287381;Phyllostachys_edulis_newGene_95192	K13811+K01011+K01738+K01011
RNA polymerase	ko03020	2	114	783	12921	PH02Gene10592;PH02Gene46587	K03017+K03021
DNA replication	ko03030	21	316	783	12921	PH02Gene19819;PH02Gene20033;PH02Gene21199;PH02Gene29871;PH02Gene32448;PH02Gene33706;PH02Gene35441;PH02Gene47669;Phyllostachys_edulis_newGene_104760;Phyllostachys_edulis_newGene_161856;Phyllostachys_edulis_newGene_199418;Phyllostachys_edulis_newGene_210855;Phyllostachys_edulis_newGene_210856;Phyllostachys_edulis_newGene_239047;Phyllostachys_edulis_newGene_241170;Phyllostachys_edulis_newGene_333572…	K07466+K10747+K02209+K07466+K03504+K02540+K02540+K03504+K02324+K07466+K07466+K07466+K07466+K10756+K04802+K02335+K07466+K07466+K04802+K07466+K07466
Glycosaminoglycan degradation	ko00531	3	41	783	12921	PH02Gene25312;PH02Gene39930;Phyllostachys_edulis_newGene_309935	K10532+K10532+K12373
Tyrosine metabolism	ko00350	6	116	783	12921	PH02Gene01841;PH02Gene06023;PH02Gene06386;PH02Gene10322;PH02Gene25013;PH02Gene28608	K00422+K01557+K00815+K01555+K00422+K00422
Mismatch repair	ko03430	16	251	783	12921	PH02Gene19819;PH02Gene20033;PH02Gene29871;PH02Gene32448;PH02Gene47669;Phyllostachys_edulis_newGene_161856;Phyllostachys_edulis_newGene_199418;Phyllostachys_edulis_newGene_210855;Phyllostachys_edulis_newGene_210856;Phyllostachys_edulis_newGene_239047;Phyllostachys_edulis_newGene_241170;Phyllostachys_edulis_newGene_364727;Phyllostachys_edulis_newGene_38707;Phyllostachys_edulis_newGene_394376;Phyllo…	K07466+K10747+K07466+K03504+K03504+K07466+K07466+K07466+K07466+K10756+K04802+K07466+K07466+K04802+K07466+K07466
Monobactam biosynthesis	ko00261	2	30	783	12921	PH02Gene11311;PH02Gene18885	K13811+K00133
Endocytosis	ko04144	25	441	783	12921	PH02Gene08162;PH02Gene09851;PH02Gene09950;PH02Gene11806;PH02Gene13891;PH02Gene14841;PH02Gene15755;PH02Gene18146;PH02Gene25270;PH02Gene26220;PH02Gene28137;PH02Gene29991;PH02Gene30373;PH02Gene39666;PH02Gene40209;PH02Gene41005;PH02Gene41324;PH02Gene42024;PH02Gene45972;Phyllostachys_edulis_newGene_117884;Phyllostachys_edulis_newGene_126478;Phyllostachys_edulis_newGene_207222;Phyllostachys_edulis_newG…	K12486+K00889+K00889+K18443+K12197+K12200+K18468+K12199+K01115+K07904+K18442+K00889+K07904+K18443+K01528+K03283+K03283+K18442+K03283+K03283+K15053+K19366+K07904+K11866+K11866
Lysine degradation	ko00310	9	113	783	12921	PH02Gene16078;PH02Gene26804;PH02Gene30348;PH02Gene38902;PH02Gene45883;PH02Gene48015;PH02Gene48016;Phyllostachys_edulis_newGene_57849;Phyllostachys_edulis_newGene_66391	K00658+K11420+K14085+K00658+K00382+K11420+K11420+K00382+K14157
Biosynthesis of unsaturated fatty acids	ko01040	3	67	783	12921	PH02Gene07862;PH02Gene28281;PH02Gene40931	K03921+K00232+K00232
Histidine metabolism	ko00340	4	51	783	12921	PH02Gene15222;PH02Gene30348;PH02Gene36949;PH02Gene49140	K00013+K14085+K01590+K01590
N-Glycan biosynthesis	ko00510	4	114	783	12921	PH02Gene01937;PH02Gene42529;PH02Gene47490;PH02Gene49679	K12345+K00729+K12666+K05546
Sulfur relay system	ko04122	3	35	783	12921	Phyllostachys_edulis_newGene_22189;Phyllostachys_edulis_newGene_291172;Phyllostachys_edulis_newGene_95192	K01011+K14168+K01011
Nitrogen metabolism	ko00910	3	70	783	12921	PH02Gene01414;PH02Gene36458;PH02Gene38234	K00264+K00264+K00284
Glycolysis / Gluconeogenesis	ko00010	20	448	783	12921	PH02Gene02303;PH02Gene09181;PH02Gene15245;PH02Gene16013;PH02Gene19622;PH02Gene20137;PH02Gene24076;PH02Gene24831;PH02Gene28763;PH02Gene30348;PH02Gene36929;PH02Gene38194;PH02Gene45883;PH02Gene46133;Phyllostachys_edulis_newGene_231242;Phyllostachys_edulis_newGene_231882;Phyllostachys_edulis_newGene_270760;Phyllostachys_edulis_newGene_403393;Phyllostachys_edulis_newGene_57849;Phyllostachys_edulis_new…	K00927+K00895+K00627+K00873+K00162+K03841+K03841+K00844+K01803+K14085+K00850+K03841+K00382+K00844+K00873+K00627+K00627+K00895+K00382+K01792
Fatty acid elongation	ko00062	1	97	783	12921	PH02Gene03898	K15397
Vitamin B6 metabolism	ko00750	2	38	783	12921	PH02Gene10261;PH02Gene42143	K08681+K23998
Photosynthesis	ko00195	6	103	783	12921	PH02Gene12318;PH02Gene22520;PH02Gene36631;PH02Gene43333;PH02Gene44511;Phyllostachys_edulis_newGene_245107	K02723+K02699+K02638+K02721+K02699+K08903
Pyruvate metabolism	ko00620	16	271	783	12921	PH02Gene00801;PH02Gene15245;PH02Gene16013;PH02Gene17585;PH02Gene19622;PH02Gene19663;PH02Gene29224;PH02Gene30348;PH02Gene42339;PH02Gene45883;Phyllostachys_edulis_newGene_231242;Phyllostachys_edulis_newGene_231882;Phyllostachys_edulis_newGene_270760;Phyllostachys_edulis_newGene_57849;Phyllostachys_edulis_newGene_77742;Phyllostachys_edulis_newGene_85521	K01595+K00627+K00873+K01595+K00162+K01595+K11262+K14085+K00029+K00382+K00873+K00627+K00627+K00382+K00029+K01759
Isoquinoline alkaloid biosynthesis	ko00950	4	49	783	12921	PH02Gene01841;PH02Gene06386;PH02Gene25013;PH02Gene28608	K00422+K00815+K00422+K00422
Other types of O-glycan biosynthesis	ko00514	2	30	783	12921	PH02Gene47357;Phyllostachys_edulis_newGene_264055	K20784+K09667
Glycosphingolipid biosynthesis - ganglio series	ko00604	1	17	783	12921	Phyllostachys_edulis_newGene_309935	K12373
Citrate cycle (TCA cycle)	ko00020	12	205	783	12921	PH02Gene15245;PH02Gene16078;PH02Gene19622;PH02Gene28692;PH02Gene29749;PH02Gene38878;PH02Gene38902;PH02Gene42116;PH02Gene45883;Phyllostachys_edulis_newGene_231882;Phyllostachys_edulis_newGene_270760;Phyllostachys_edulis_newGene_57849	K00627+K00658+K00162+K01681+K01648+K01681+K00658+K00030+K00382+K00627+K00627+K00382
Nicotinate and nicotinamide metabolism	ko00760	6	71	783	12921	PH02Gene12981;PH02Gene18822;PH02Gene32537;PH02Gene47854;PH02Gene49440;Phyllostachys_edulis_newGene_403862	K03426+K00858+K11414+K00858+K03517+K11414
Steroid biosynthesis	ko00100	14	90	783	12921	PH02Gene14338;PH02Gene15780;PH02Gene27859;PH02Gene28688;PH02Gene29184;PH02Gene29384;PH02Gene31441;PH02Gene42720;PH02Gene43157;PH02Gene48578;PH02Gene49226;Phyllostachys_edulis_newGene_347495;Phyllostachys_edulis_newGene_37186;Phyllostachys_edulis_newGene_90215	K01853+K00801+K00801+K08242+K14674+K01853+K14674+K00801+K00801+K08242+K00511+K00559+K00559+K23558
Arginine biosynthesis	ko00220	3	100	783	12921	PH02Gene07041;PH02Gene46818;Phyllostachys_edulis_newGene_129684	K14677+K14272+K00930
Non-homologous end-joining	ko03450	1	30	783	12921	Phyllostachys_edulis_newGene_100589	K03512
2-Oxocarboxylic acid metabolism	ko01210	7	192	783	12921	PH02Gene07041;PH02Gene18885;PH02Gene28692;PH02Gene38878;PH02Gene42116;PH02Gene46818;Phyllostachys_edulis_newGene_129684	K14677+K00133+K01681+K01681+K00030+K14272+K00930
Glycerophospholipid metabolism	ko00564	17	272	783	12921	PH02Gene01495;PH02Gene10048;PH02Gene10074;PH02Gene12089;PH02Gene24646;PH02Gene25270;PH02Gene25355;PH02Gene27440;PH02Gene29184;PH02Gene31441;PH02Gene34638;PH02Gene37982;PH02Gene39621;PH02Gene39638;PH02Gene44020;PH02Gene46522;Phyllostachys_edulis_newGene_175231	K13519+K00901+K00006+K13511+K01126+K01115+K06124+K06124+K14674+K14674+K13513+K16818+K18696+K13508+K15728+K06124+K00901
Peroxisome	ko04146	18	233	783	12921	PH02Gene10444;PH02Gene10597;PH02Gene12981;PH02Gene19647;PH02Gene19975;PH02Gene22140;PH02Gene28281;PH02Gene33191;PH02Gene35117;PH02Gene36808;PH02Gene38530;PH02Gene39954;PH02Gene40931;PH02Gene43183;PH02Gene44382;PH02Gene48771;Phyllostachys_edulis_newGene_379329;Phyllostachys_edulis_newGene_379331	K04565+K11517+K03426+K13343+K04565+K13348+K00232+K04565+K04565+K04565+K11517+K01897+K00232+K04564+K13338+K04565+K13338+K13338
Thiamine metabolism	ko00730	1	68	783	12921	PH02Gene45630	K22911
Autophagy - other	ko04136	2	93	783	12921	PH02Gene25724;PH02Gene46341	K00914+K17907
Arachidonic acid metabolism	ko00590	3	33	783	12921	PH02Gene14223;PH02Gene29184;PH02Gene31441	K00079+K14674+K14674
Valine, leucine and isoleucine degradation	ko00280	5	144	783	12921	PH02Gene16160;PH02Gene30348;PH02Gene45883;Phyllostachys_edulis_newGene_21219;Phyllostachys_edulis_newGene_57849	K01641+K14085+K00382+K23146+K00382
Ubiquinone and other terpenoid-quinone biosynthesis	ko00130	8	101	783	12921	PH02Gene06386;PH02Gene14274;PH02Gene20295;PH02Gene27719;PH02Gene37844;PH02Gene39835;PH02Gene46579;Phyllostachys_edulis_newGene_360741	K00815+K03809+K12502+K02552+K12501+K19222+K02552+K01904
alpha-Linolenic acid metabolism	ko00592	13	126	783	12921	PH02Gene14817;PH02Gene14819;PH02Gene17774;PH02Gene20989;PH02Gene21016;PH02Gene28163;PH02Gene28281;PH02Gene29184;PH02Gene31441;PH02Gene37982;PH02Gene40931;PH02Gene43623;Phyllostachys_edulis_newGene_205437	K05894+K05894+K01723+K01723+K01723+K05894+K00232+K14674+K14674+K16818+K00232+K05894+K00224
Glutathione metabolism	ko00480	16	283	783	12921	PH02Gene04358;PH02Gene05076;PH02Gene15208;PH02Gene18614;PH02Gene27519;PH02Gene29147;PH02Gene34964;PH02Gene34972;PH02Gene34975;PH02Gene36820;PH02Gene37441;Phyllostachys_edulis_newGene_14751;Phyllostachys_edulis_newGene_167249;Phyllostachys_edulis_newGene_26737;Phyllostachys_edulis_newGene_382978;Phyllostachys_edulis_newGene_51114	K01919+K01581+K00799+K00434+K00033+K00036+K00799+K00799+K00799+K00799+K00799+K00434+K00434+K10807+K00033+K00434
Ascorbate and aldarate metabolism	ko00053	9	160	783	12921	PH02Gene17138;PH02Gene18614;PH02Gene30348;PH02Gene34485;PH02Gene43946;Phyllostachys_edulis_newGene_14751;Phyllostachys_edulis_newGene_167249;Phyllostachys_edulis_newGene_4210;Phyllostachys_edulis_newGene_51114	K00423+K00434+K14085+K08232+K00225+K00434+K00434+K14190+K00434
Inositol phosphate metabolism	ko00562	22	184	783	12921	PH02Gene00071;PH02Gene00417;PH02Gene05492;PH02Gene07189;PH02Gene09851;PH02Gene09950;PH02Gene13904;PH02Gene22542;PH02Gene23099;PH02Gene25479;PH02Gene25724;PH02Gene27838;PH02Gene28763;PH02Gene29991;PH02Gene31555;PH02Gene39522;PH02Gene40888;PH02Gene43473;Phyllostachys_edulis_newGene_254107;Phyllostachys_edulis_newGene_286715;Phyllostachys_edulis_newGene_297386;Phyllostachys_edulis_newGene_361040	K05857+K10572+K22913+K01765+K00889+K00889+K00888+K00921+K01765+K00921+K00914+K00921+K01803+K00889+K00921+K10572+K22913+K19801+K22913+K22913+K00913+K00921
Circadian rhythm - plant	ko04712	8	108	783	12921	PH02Gene09521;PH02Gene10639;PH02Gene11458;PH02Gene16637;PH02Gene22166;PH02Gene32376;PH02Gene40436;PH02Gene48527	K12119+K16241+K12130+K12129+K12125+K00660+K12119+K00660
Tropane, piperidine and pyridine alkaloid biosynthesis	ko00960	1	50	783	12921	PH02Gene06386	K00815
Glycosphingolipid biosynthesis - globo and isoglobo series	ko00603	2	26	783	12921	Phyllostachys_edulis_newGene_228433;Phyllostachys_edulis_newGene_309935	K07407+K12373
Biosynthesis of various secondary metabolites - part 2	ko00998	3	4	783	12921	PH02Gene38360;PH02Gene38361;PH02Gene51021	K21568+K21568+K21568
Porphyrin and chlorophyll metabolism	ko00860	5	109	783	12921	PH02Gene25100;PH02Gene25454;PH02Gene41172;Phyllostachys_edulis_newGene_141833;Phyllostachys_edulis_newGene_396297	K03403+K03403+K02492+K13600+K13606
Basal transcription factors	ko03022	5	108	783	12921	PH02Gene15495;PH02Gene32979;PH02Gene35369;PH02Gene40170;Phyllostachys_edulis_newGene_93427	K03126+K03131+K03131+K03138+K10845
Butanoate metabolism	ko00650	3	75	783	12921	PH02Gene16160;Phyllostachys_edulis_newGene_224291;Phyllostachys_edulis_newGene_25716	K01641+K17761+K17761
Phagosome	ko04145	18	184	783	12921	PH02Gene00235;PH02Gene04941;PH02Gene06595;PH02Gene14984;PH02Gene17140;PH02Gene22542;PH02Gene23396;PH02Gene23827;PH02Gene25479;PH02Gene25724;PH02Gene27838;PH02Gene31555;PH02Gene38708;PH02Gene46347;Phyllostachys_edulis_newGene_118737;Phyllostachys_edulis_newGene_302693;Phyllostachys_edulis_newGene_360180;Phyllostachys_edulis_newGene_361040	K02147+K02154+K03661+K02147+K02147+K00921+K07375+K02154+K00921+K00914+K00921+K00921+K10956+K02147+K08492+K03661+K02145+K00921
Fructose and mannose metabolism	ko00051	11	191	783	12921	PH02Gene09181;PH02Gene20137;PH02Gene21788;PH02Gene24076;PH02Gene24831;PH02Gene28763;PH02Gene36929;PH02Gene38194;PH02Gene46133;Phyllostachys_edulis_newGene_192183;Phyllostachys_edulis_newGene_403393	K00895+K03841+K01805+K03841+K00844+K01803+K00850+K03841+K00844+K02377+K00895
Propanoate metabolism	ko00640	6	99	783	12921	PH02Gene28281;PH02Gene29224;PH02Gene40931;PH02Gene45883;Phyllostachys_edulis_newGene_21219;Phyllostachys_edulis_newGene_57849	K00232+K11262+K00232+K00382+K23146+K00382
beta-Alanine metabolism	ko00410	4	107	783	12921	PH02Gene28281;PH02Gene30348;PH02Gene40931;Phyllostachys_edulis_newGene_21219	K00232+K14085+K00232+K23146
Various types of N-glycan biosynthesis	ko00513	2	94	783	12921	PH02Gene47490;Phyllostachys_edulis_newGene_309935	K12666+K12373
Ether lipid metabolism	ko00565	4	77	783	12921	PH02Gene01495;PH02Gene25270;PH02Gene29184;PH02Gene31441	K13519+K01115+K14674+K14674
Flavonoid biosynthesis	ko00941	11	69	783	12921	PH02Gene00407;PH02Gene06655;PH02Gene24448;PH02Gene32095;PH02Gene32376;PH02Gene38403;PH02Gene44082;PH02Gene46022;PH02Gene48527;PH02Gene49786;Phyllostachys_edulis_newGene_271716	K00475+K13065+K13065+K08695+K00660+K01859+K13081+K08695+K00660+K00475+K01859
Pentose phosphate pathway	ko00030	15	165	783	12921	PH02Gene09181;PH02Gene20137;PH02Gene24076;PH02Gene27519;PH02Gene29147;PH02Gene35032;PH02Gene36929;PH02Gene38142;PH02Gene38194;PH02Gene51251;Phyllostachys_edulis_newGene_211359;Phyllostachys_edulis_newGene_24625;Phyllostachys_edulis_newGene_310941;Phyllostachys_edulis_newGene_382978;Phyllostachys_edulis_newGene_403393	K00895+K03841+K03841+K00033+K00036+K01783+K00850+K01783+K03841+K01783+K01783+K01783+K01783+K00033+K00895
Terpenoid backbone biosynthesis	ko00900	11	178	783	12921	PH02Gene12707;PH02Gene16160;PH02Gene28858;PH02Gene32702;PH02Gene37074;Phyllostachys_edulis_newGene_202787;Phyllostachys_edulis_newGene_231419;Phyllostachys_edulis_newGene_352269;Phyllostachys_edulis_newGene_369279;Phyllostachys_edulis_newGene_67161;Phyllostachys_edulis_newGene_72488	K11778+K01641+K00919+K00938+K15889+K12742+K15889+K00938+K15889+K11778+K15889
Glycine, serine and threonine metabolism	ko00260	9	196	783	12921	PH02Gene09705;PH02Gene18885;PH02Gene30348;PH02Gene31351;PH02Gene45883;PH02Gene46818;Phyllostachys_edulis_newGene_111021;Phyllostachys_edulis_newGene_40570;Phyllostachys_edulis_newGene_57849	K15919+K00133+K14085+K15893+K00382+K14272+K00130+K00605+K00382
Folate biosynthesis	ko00790	3	59	783	12921	PH02Gene02769;PH02Gene14223;PH02Gene48367	K13950+K00079+K13950
Oxidative phosphorylation	ko00190	25	282	783	12921	PH02Gene00235;PH02Gene03959;PH02Gene04941;PH02Gene06595;PH02Gene09192;PH02Gene11832;PH02Gene14984;PH02Gene17140;PH02Gene23827;PH02Gene29217;PH02Gene33921;PH02Gene34854;PH02Gene46347;PH02Gene49176;Phyllostachys_edulis_newGene_112951;Phyllostachys_edulis_newGene_112952;Phyllostachys_edulis_newGene_113950;Phyllostachys_edulis_newGene_179022;Phyllostachys_edulis_newGene_271532;Phyllostachys_edulis_ne…	K02147+K11352+K02154+K03661+K00413+K01535+K02147+K02147+K02154+K02265+K11352+K02140+K02147+K02140+K02140+K02140+K05579+K05579+K01535+K02134+K03661+K02145+K03943+K01535+K01535
Fatty acid biosynthesis	ko00061	5	121	783	12921	PH02Gene07862;PH02Gene29224;PH02Gene32268;PH02Gene39954;PH02Gene41877	K03921+K11262+K00208+K01897+K10781
Pyrimidine metabolism	ko00240	10	173	783	12921	PH02Gene01691;PH02Gene19986;PH02Gene21042;PH02Gene25792;PH02Gene26946;PH02Gene33401;PH02Gene47223;PH02Gene49699;Phyllostachys_edulis_newGene_263352;Phyllostachys_edulis_newGene_26737	K01937+K01937+K13421+K00876+K01937+K01937+K00761+K13421+K00876+K10807
SNARE interactions in vesicular transport	ko04130	1	87	783	12921	Phyllostachys_edulis_newGene_118737	K08492
RNA transport	ko03013	43	487	783	12921	PH02Gene00202;PH02Gene01074;PH02Gene03519;PH02Gene05863;PH02Gene06626;PH02Gene07154;PH02Gene09508;PH02Gene10577;PH02Gene12056;PH02Gene12341;PH02Gene16194;PH02Gene16506;PH02Gene17758;PH02Gene18096;PH02Gene18202;PH02Gene20446;PH02Gene21836;PH02Gene24584;PH02Gene25243;PH02Gene25927;PH02Gene27025;PH02Gene27282;PH02Gene31285;PH02Gene33788;PH02Gene36126;PH02Gene41155;PH02Gene42007;PH02Gene42358;PH02Gen…	K13171+K09291+K13171+K03240+K13126+K03240+K03754+K14288+K13137+K14293+K12812+K14288+K03754+K03260+K12875+K03259+K14004+K03246+K13137+K03240+K14294+K03246+K14293+K03240+K14004+K03254+K03260+K14293+K03113+K14317+K12812+K13137+K03260+K03241+K14300+K12880+K14310+K14326+K03113+K03754+K03241+K14319+K03246
Glyoxylate and dicarboxylate metabolism	ko00630	12	211	783	12921	PH02Gene09705;PH02Gene10597;PH02Gene28692;PH02Gene31351;PH02Gene38234;PH02Gene38530;PH02Gene38878;PH02Gene45883;PH02Gene46818;Phyllostachys_edulis_newGene_40570;Phyllostachys_edulis_newGene_5244;Phyllostachys_edulis_newGene_57849	K15919+K11517+K01681+K15893+K00284+K11517+K01681+K00382+K14272+K00605+K01601+K00382
Synthesis and degradation of ketone bodies	ko00072	1	17	783	12921	PH02Gene16160	K01641
Protein export	ko03060	16	159	783	12921	PH02Gene07919;PH02Gene08419;PH02Gene10731;PH02Gene12131;PH02Gene13145;PH02Gene13149;PH02Gene21434;PH02Gene31128;PH02Gene38708;PH02Gene39888;PH02Gene42441;PH02Gene46105;PH02Gene51198;PH02Gene51199;Phyllostachys_edulis_newGene_400277;Phyllostachys_edulis_newGene_45494	K03108+K03070+K03108+K09540+K09540+K09540+K03070+K09490+K10956+K03100+K13431+K09540+K03070+K03070+K13431+K03105
Phenylalanine metabolism	ko00360	1	92	783	12921	PH02Gene06386	K00815
Phosphatidylinositol signaling system	ko04070	18	167	783	12921	PH02Gene00071;PH02Gene00417;PH02Gene09851;PH02Gene09950;PH02Gene10048;PH02Gene13904;PH02Gene22542;PH02Gene25479;PH02Gene25724;PH02Gene27838;PH02Gene29991;PH02Gene31555;PH02Gene39522;PH02Gene43473;Phyllostachys_edulis_newGene_175231;Phyllostachys_edulis_newGene_265525;Phyllostachys_edulis_newGene_297386;Phyllostachys_edulis_newGene_361040	K05857+K10572+K00889+K00889+K00901+K00888+K00921+K00921+K00914+K00921+K00889+K00921+K10572+K19801+K00901+K02183+K00913+K00921
Purine metabolism	ko00230	14	305	783	12921	PH02Gene11311;PH02Gene13464;PH02Gene15308;PH02Gene16013;PH02Gene20406;PH02Gene34816;PH02Gene42488;PH02Gene49651;Phyllostachys_edulis_newGene_188776;Phyllostachys_edulis_newGene_231242;Phyllostachys_edulis_newGene_26737;Phyllostachys_edulis_newGene_283444;Phyllostachys_edulis_newGene_308189;Phyllostachys_edulis_newGene_36382	K13811+K00088+K00951+K00873+K11808+K11808+K01951+K00088+K00601+K00873+K10807+K00951+K01952+K18151
mRNA surveillance pathway	ko03015	28	351	783	12921	PH02Gene00202;PH02Gene03519;PH02Gene04755;PH02Gene06626;PH02Gene08305;PH02Gene10507;PH02Gene12528;PH02Gene15637;PH02Gene16194;PH02Gene18202;PH02Gene18689;PH02Gene21699;PH02Gene22599;PH02Gene23508;PH02Gene23995;PH02Gene27025;PH02Gene27220;PH02Gene27266;PH02Gene28232;PH02Gene29895;PH02Gene32942;PH02Gene34853;PH02Gene39513;PH02Gene45808;Phyllostachys_edulis_newGene_124151;Phyllostachys_edulis_newGen…	K13171+K13171+K11583+K13126+K06100+K14407+K08873+K03265+K12812+K12875+K04354+K14406+K00565+K14407+K14411+K14294+K14416+K08873+K14409+K03265+K14376+K04354+K06965+K12812+K14411+K14404+K14326+K15542
Sphingolipid metabolism	ko00600	9	83	783	12921	PH02Gene01043;PH02Gene06451;PH02Gene21055;PH02Gene27083;PH02Gene27567;PH02Gene44596;PH02Gene45960;Phyllostachys_edulis_newGene_228433;Phyllostachys_edulis_newGene_377023	K04713+K04713+K01190+K04718+K01634+K01634+K17108+K07407+K12382
Base excision repair	ko03410	10	145	783	12921	PH02Gene17312;PH02Gene20033;PH02Gene32448;PH02Gene33460;PH02Gene47669;Phyllostachys_edulis_newGene_100589;Phyllostachys_edulis_newGene_104760;Phyllostachys_edulis_newGene_241170;Phyllostachys_edulis_newGene_333572;Phyllostachys_edulis_newGene_394376	K10773+K10747+K03504+K10798+K03504+K03512+K02324+K04802+K02335+K04802
Other glycan degradation	ko00511	4	59	783	12921	PH02Gene21055;PH02Gene24278;PH02Gene45960;Phyllostachys_edulis_newGene_309935	K01190+K01444+K17108+K12373
Galactose metabolism	ko00052	6	158	783	12921	PH02Gene05641;PH02Gene21055;PH02Gene24831;PH02Gene36929;PH02Gene46133;Phyllostachys_edulis_newGene_228433	K00963+K01190+K00844+K00850+K00844+K07407
Alanine, aspartate and glutamate metabolism	ko00250	6	166	783	12921	PH02Gene01414;PH02Gene21464;PH02Gene36458;PH02Gene46818;Phyllostachys_edulis_newGene_224291;Phyllostachys_edulis_newGene_25716	K00264+K00294+K00264+K14272+K17761+K17761
MAPK signaling pathway - plant	ko04016	16	360	783	12921	PH02Gene02673;PH02Gene03062;PH02Gene18129;PH02Gene22980;PH02Gene24567;PH02Gene27493;PH02Gene27913;PH02Gene30857;PH02Gene33463;PH02Gene33717;PH02Gene36885;PH02Gene41993;PH02Gene47032;PH02Gene50995;Phyllostachys_edulis_newGene_265525;Phyllostachys_edulis_newGene_352022	K13413+K13447+K14514+K20606+K14497+K17686+K20725+K13447+K14497+K14513+K20725+K14498+K20558+K20606+K02183+K20606
Phenylpropanoid biosynthesis	ko00940	28	433	783	12921	PH02Gene00244;PH02Gene00246;PH02Gene00247;PH02Gene02696;PH02Gene03921;PH02Gene04611;PH02Gene04883;PH02Gene06655;PH02Gene08069;PH02Gene11957;PH02Gene12431;PH02Gene19810;PH02Gene19972;PH02Gene24448;PH02Gene26501;PH02Gene26563;PH02Gene26819;PH02Gene27381;PH02Gene34211;PH02Gene35837;PH02Gene38601;PH02Gene40519;PH02Gene46530;PH02Gene50151;PH02Gene50472;Phyllostachys_edulis_newGene_26585;Phyllostachys_…	K00430+K00430+K00430+K09753+K00430+K01188+K00430+K13065+K00430+K00430+K00430+K01188+K05349+K13065+K00430+K00430+K00430+K00430+K00430+K00430+K05349+K18368+K00430+K00430+K00430+K00430+K01904+K01188
Phenylalanine, tyrosine and tryptophan biosynthesis	ko00400	5	134	783	12921	PH02Gene06386;PH02Gene08600;PH02Gene40731;Phyllostachys_edulis_newGene_32417;Phyllostachys_edulis_newGene_335203	K00815+K00891+K01626+K01658+K15227
Plant-pathogen interaction	ko04626	34	566	783	12921	PH02Gene00632;PH02Gene00859;PH02Gene01218;PH02Gene02327;PH02Gene02673;PH02Gene03062;PH02Gene03898;PH02Gene05594;PH02Gene05692;PH02Gene06339;PH02Gene07139;PH02Gene09304;PH02Gene11353;PH02Gene18093;PH02Gene21535;PH02Gene25955;PH02Gene28639;PH02Gene30857;PH02Gene35073;PH02Gene36336;PH02Gene37918;PH02Gene40165;PH02Gene40768;PH02Gene42364;PH02Gene44790;PH02Gene45941;PH02Gene47042;PH02Gene50271;Phyllos…	K13412+K13412+K13448+K13412+K13413+K13447+K15397+K13412+K13412+K13412+K13429+K05391+K13436+K09487+K09487+K13459+K13456+K13447+K13436+K13457+K13412+K13436+K13457+K13457+K13436+K13457+K05391+K13457+K05391+K09487+K05391+K02183+K13457+K13459
Riboflavin metabolism	ko00740	3	50	783	12921	PH02Gene06671;PH02Gene24438;PH02Gene44373	K00794+K00794+K14379
Photosynthesis - antenna proteins	ko00196	7	34	783	12921	PH02Gene01341;PH02Gene04237;PH02Gene18375;PH02Gene32429;PH02Gene45538;PH02Gene49412;Phyllostachys_edulis_newGene_16268	K08912+K08912+K08917+K08912+K08912+K08912+K08913
Nucleotide excision repair	ko03420	21	327	783	12921	PH02Gene11896;PH02Gene19819;PH02Gene20033;PH02Gene29583;PH02Gene29871;PH02Gene32448;PH02Gene47669;Phyllostachys_edulis_newGene_104760;Phyllostachys_edulis_newGene_161856;Phyllostachys_edulis_newGene_199418;Phyllostachys_edulis_newGene_210855;Phyllostachys_edulis_newGene_210856;Phyllostachys_edulis_newGene_239047;Phyllostachys_edulis_newGene_241170;Phyllostachys_edulis_newGene_333572;Phyllostachys…	K10846+K07466+K10747+K10848+K07466+K03504+K03504+K02324+K07466+K07466+K07466+K07466+K10756+K04802+K02335+K07466+K07466+K04802+K07466+K07466+K10845
Biotin metabolism	ko00780	3	66	783	12921	PH02Gene32268;Phyllostachys_edulis_newGene_140388;Phyllostachys_edulis_newGene_144075	K00208+K01012+K01942
Zeatin biosynthesis	ko00908	1	53	783	12921	PH02Gene30452	K00279
Glycerolipid metabolism	ko00561	14	211	783	12921	PH02Gene01495;PH02Gene04097;PH02Gene10048;PH02Gene29184;PH02Gene30348;PH02Gene31441;PH02Gene34638;PH02Gene39638;PH02Gene44020;Phyllostachys_edulis_newGene_175231;Phyllostachys_edulis_newGene_228433;Phyllostachys_edulis_newGene_276803;Phyllostachys_edulis_newGene_324718;Phyllostachys_edulis_newGene_324727	K13519+K06119+K00901+K14674+K14085+K14674+K13513+K13508+K15728+K00901+K07407+K22848+K22848+K22848
RNA degradation	ko03018	22	297	783	12921	PH02Gene00737;PH02Gene02456;PH02Gene03203;PH02Gene06626;PH02Gene09626;PH02Gene11377;PH02Gene13240;PH02Gene17478;PH02Gene18337;PH02Gene22939;PH02Gene28767;PH02Gene31340;PH02Gene36929;PH02Gene38464;PH02Gene38569;PH02Gene41569;PH02Gene43318;PH02Gene48213;Phyllostachys_edulis_newGene_278747;Phyllostachys_edulis_newGene_338139;Phyllostachys_edulis_newGene_386029;Phyllostachys_edulis_newGene_95542	K12617+K12587+K01148+K13126+K12606+K01148+K14442+K12589+K12581+K03514+K03514+K04077+K00850+K04077+K14442+K04077+K03514+K01148+K12591+K03681+K03681+K12605
Amino sugar and nucleotide sugar metabolism	ko00520	16	395	783	12921	PH02Gene00770;PH02Gene05185;PH02Gene05557;PH02Gene05641;PH02Gene09657;PH02Gene12922;PH02Gene16138;PH02Gene16603;PH02Gene24768;PH02Gene24831;PH02Gene33145;PH02Gene37225;PH02Gene39230;PH02Gene46133;Phyllostachys_edulis_newGene_192183;Phyllostachys_edulis_newGene_309935	K13379+K01183+K13648+K00963+K00972+K01183+K13648+K00972+K12446+K00844+K01183+K00975+K13648+K00844+K02377+K12373
Fatty acid metabolism	ko01212	7	198	783	12921	PH02Gene07862;PH02Gene28281;PH02Gene29224;PH02Gene32268;PH02Gene39954;PH02Gene40931;PH02Gene41877	K03921+K00232+K11262+K00208+K01897+K00232+K10781
Starch and sucrose metabolism	ko00500	22	427	783	12921	PH02Gene02657;PH02Gene02950;PH02Gene04611;PH02Gene05641;PH02Gene07694;PH02Gene07928;PH02Gene10028;PH02Gene14811;PH02Gene17891;PH02Gene19810;PH02Gene19972;PH02Gene23984;PH02Gene24831;PH02Gene27917;PH02Gene30638;PH02Gene37225;PH02Gene38601;PH02Gene46133;PH02Gene48823;Phyllostachys_edulis_newGene_210996;Phyllostachys_edulis_newGene_368764;Phyllostachys_edulis_newGene_48802	K00695+K01087+K01188+K00963+K00688+K00703+K00703+K01179+K19892+K01188+K05349+K16055+K00844+K00695+K00696+K00975+K05349+K00844+K16055+K00688+K16055+K01188
Cutin, suberine and wax biosynthesis	ko00073	3	75	783	12921	PH02Gene04851;PH02Gene20351;Phyllostachys_edulis_newGene_70709	K17991+K15398+K17991
